# Supplementary material for: Differential Role for a Defined Lateral Horn Neuron Subset in Naïve Odor Valence in Drosophila
Source: PubMed Central journal article supplement (PMC7145822; doi:10.1038/s41598-020-63169-3), 2020-04-09
Supplement: 41598_2020_63169_MOESM1_ESM.pdf [file 41598_2020_63169_MOESM1_ESM.pdf]

## **Supplementary Information**

### **Differential Role for a Defined Lateral Horn Neuron Subset in Naïve Odor Valence in *Drosophila***

Hadas Lerner, Eyal Rozenfeld, Bar Rozenman, Wolf Huetteroth, and Moshe Parnas

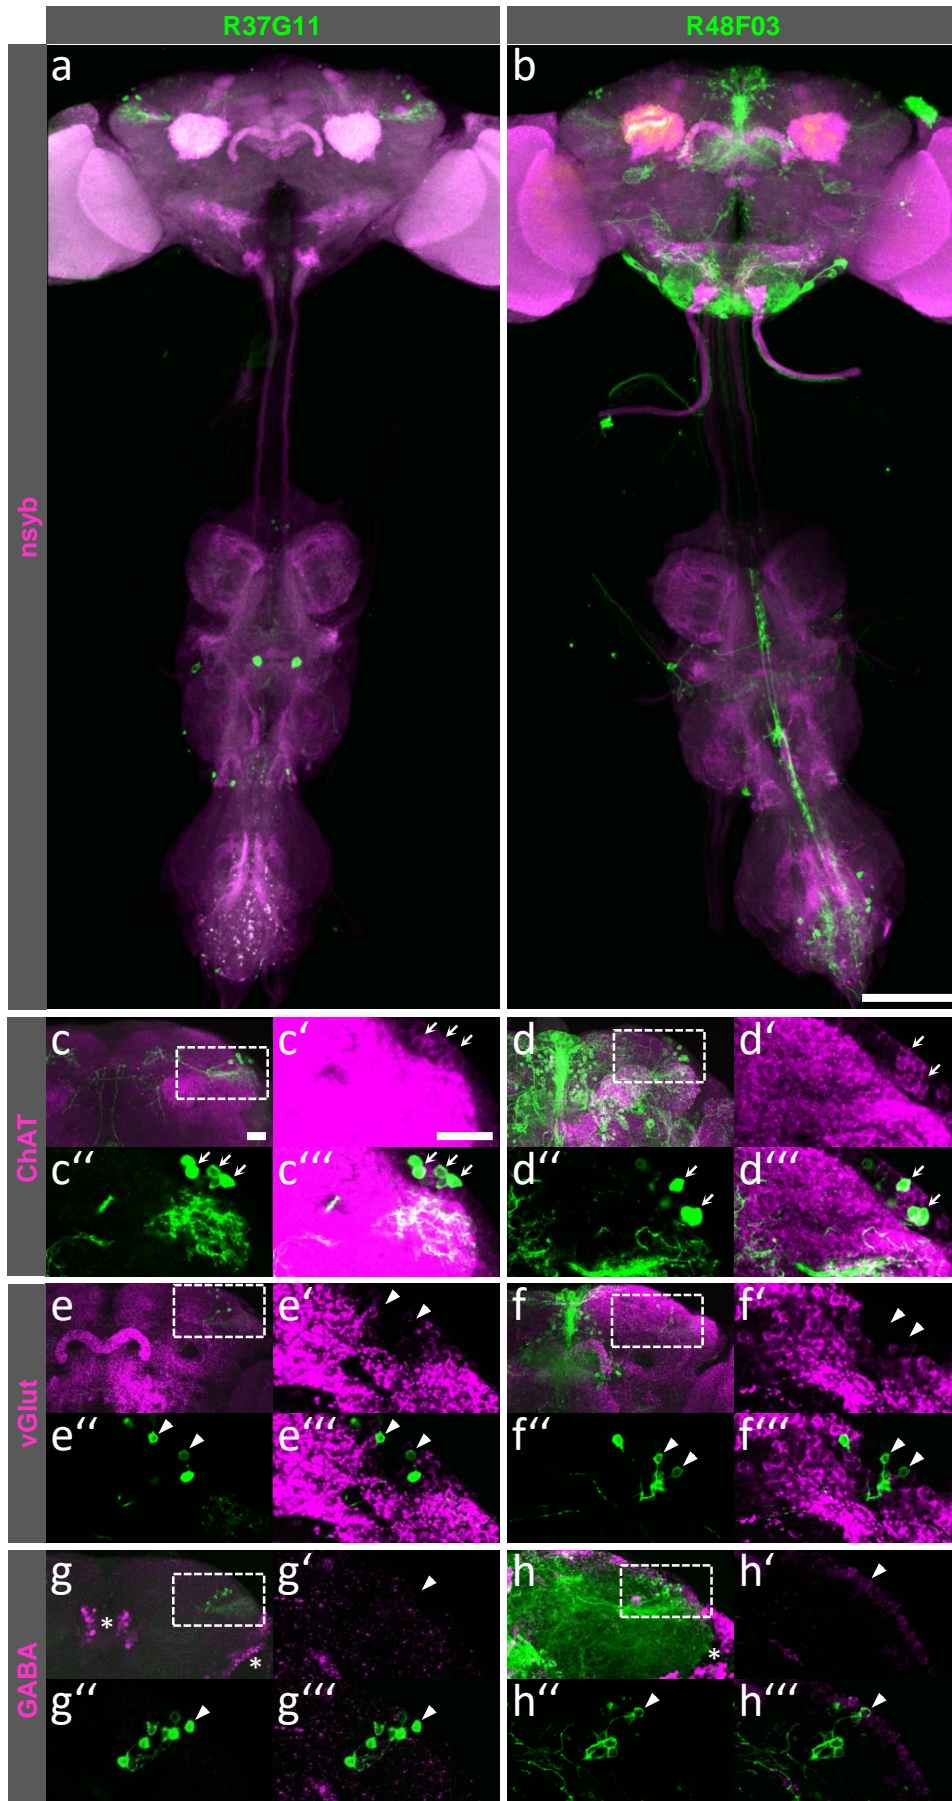

**Figure S1: R37G11-GAL4 and R48F03-GAL4 drivers both label cholinergic neurons in the LH**

**a.** R37G11-GAL4 driven mCD8::GFP (green) shows a sparse label of 6-7 cells in the lateral horn and almost no label in the thoracico-abdominal ganglia (TAG). Neuropilar reference label by nsyb-driven rCD2::RFP (magenta).

**b.** R48F03-GAL4-driven mCD8::GFP (green) labels 18-22 cells in the lateral horn, but also shows staining in the pars intercerebralis, the fan-shaped body, the gnathal ganglia and the TAG. Neuropilar reference label was by nsyb-driven rCD2::RFP (magenta).

**c-h'''**. Immunohistochemical co-labeling of GFP (green) driven by both driver lines together with antisera against either acetylcholine-synthesizing enzyme ChAT (**c,d**), the glutamate transporter vGlut (**e,f**), or GABA (**g,h**) (magenta) reveals colocalization of ChAT in somata of both lines (arrows in **c'-d'''**), but not colocalization of vGlut or GABA (arrowheads in **e'-h'''**). GABA-positive cell groups can be seen in overviews (asterisks in **g, h**). Dashed boxes in overviews (**c-h**) denote the corresponding, same-lettered enlarged regions. **a-h**: projection views of 1,5 - 2  $\mu\text{m}$ -thick optical sections; **c'-c'''**, **d'-d'''**, **e'-e'''**, **f'-f'''**, **g'-g'''**, **h'-h'''**: single 1  $\mu\text{m}$ -thick optical sections. Scale bars: **a,b**: 100  $\mu\text{m}$ ; **c-h'''**: 20  $\mu\text{m}$ .

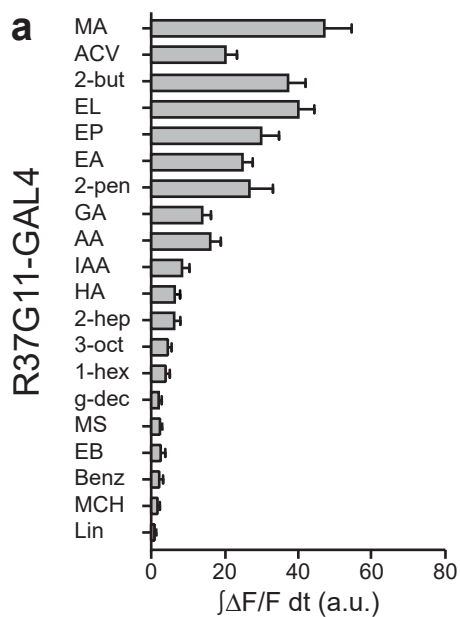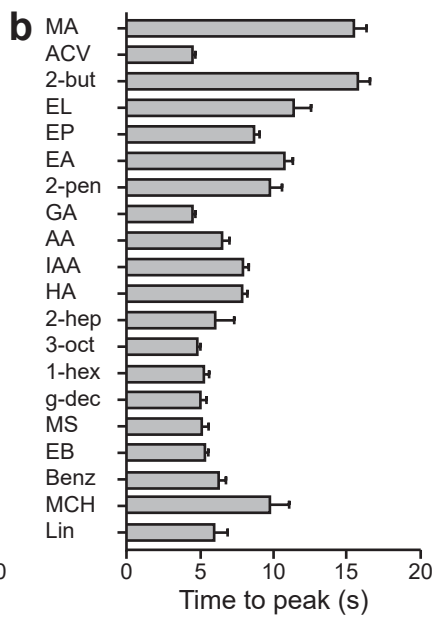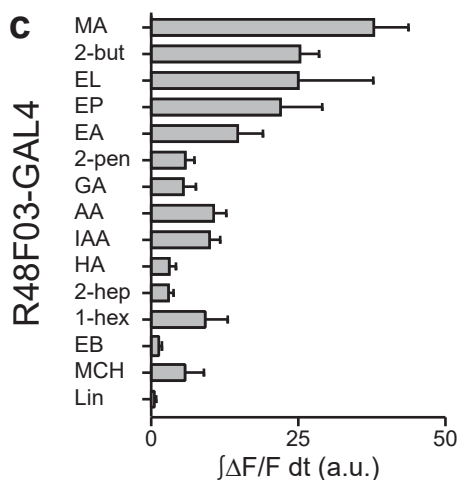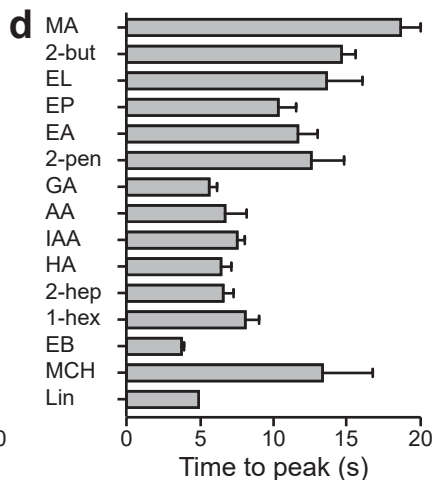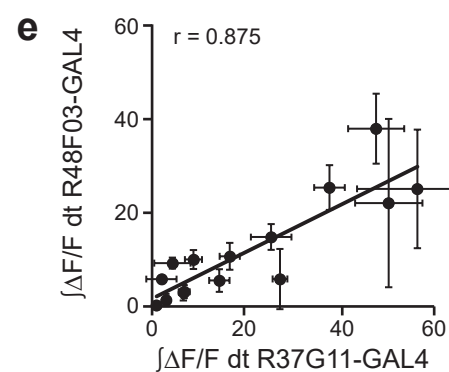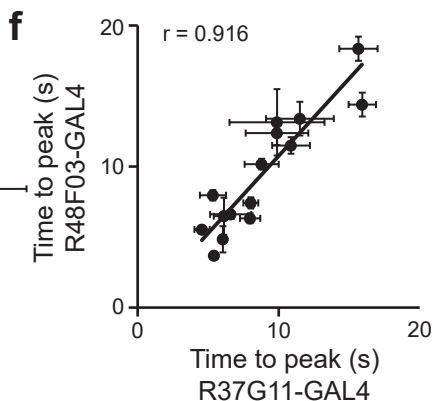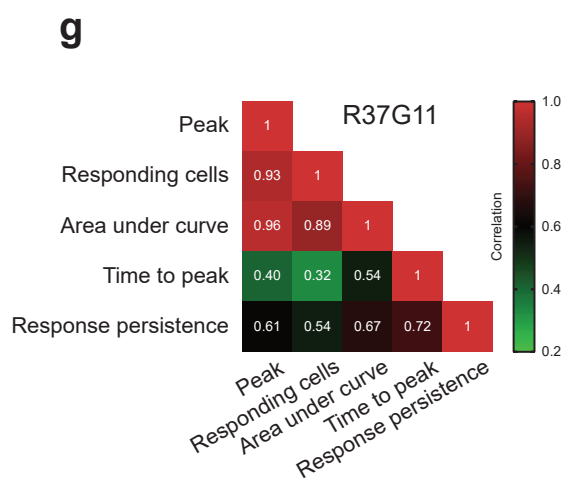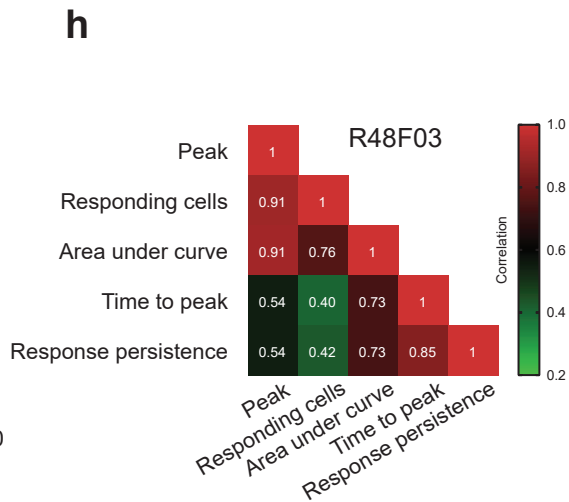

**Figure S2: PD2a1/b1 neurons display varied odor responses to high odor concentrations -**

**Additional parameters for Fig 1**

**a, c.** The integral of the odor response (from the onset of odor pulse and up to 35 s afterwards) for R37G11-GAL4 (a) and R48F03-GAL4 (c). ( $55 \geq n \geq 20$  and  $46 \geq n \geq 14$  cells, respectively. At least 5 different flies were imaged from each genotype.)

**b, d.** Time to peak analysis for R37G11-GAL4 (b) and R48F03-GAL4 (d). ( $55 \geq n \geq 20$  and  $46 \geq n \geq 14$  cells, respectively. At least 5 different flies were imaged from each genotype.)

**e, f.** Correlation between the parameters obtained for R37G11-GAL4 and R48F03-GAL4 for the integral of the odor response (e) and the time to peak (f).

**g, h.** Correlation values between peak responses, percent of responding neurons, response persistence, time to peak and the area under the curve was calculated for R37G11-GAL4 (g) and R48F03-GAL (h). (See Supplementary Table S1 for statistical analysis).

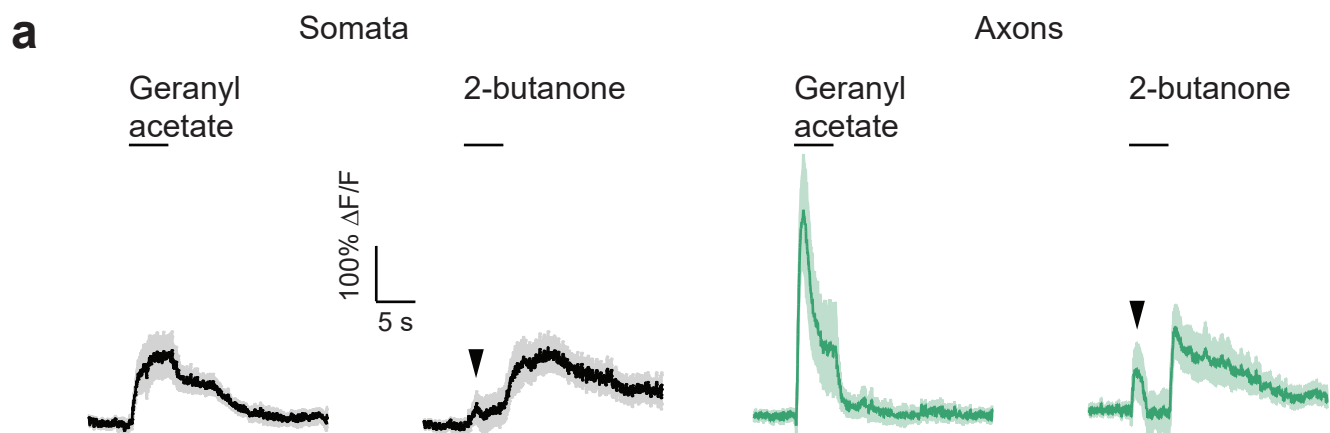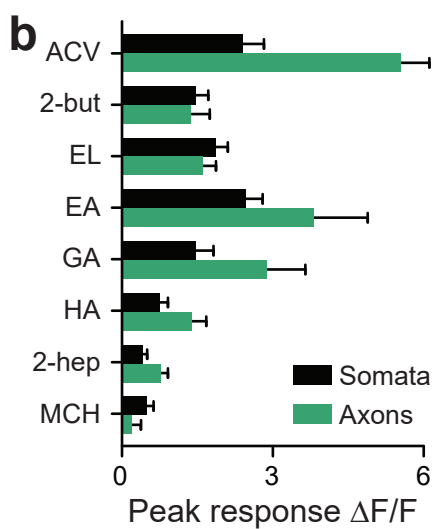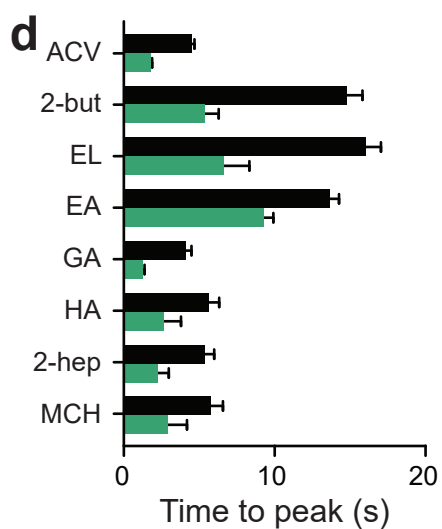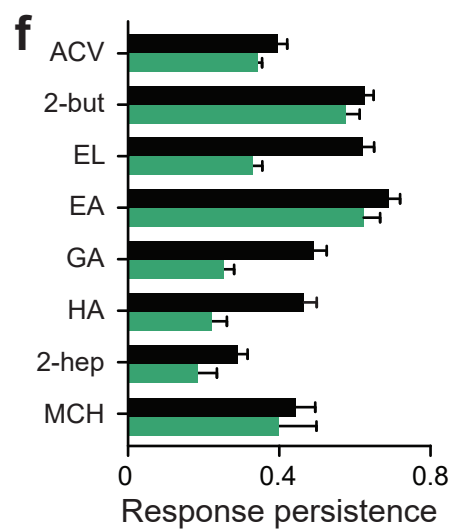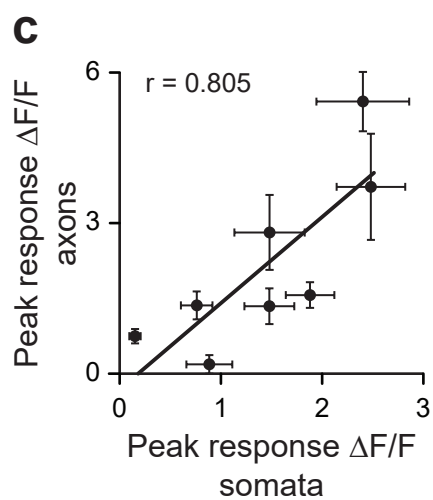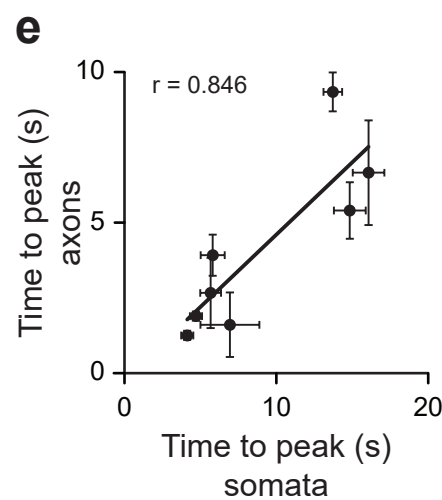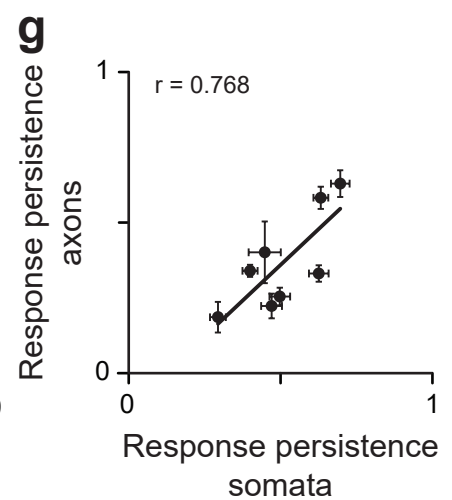

### **Figure S3: Odorant-evoked activity in PD2a1/b1 somata and axons**

- a.** Examples of odor responses for somata (black) and axonal projections (green) for the designated odors. The black arrow indicates a fast transient response which is clearly observed at the axonal terminal and can still be observed, even though filtered, at the soma.
- b.** Analysis of the peak odor responses in somata and axonal projections. Axonal responses were significantly stronger than soma responses. ( $47 \geq n \geq 24$  cells, from at least 5 different flies; see Supplementary Table S1 for statistical analysis.)
- c.** Correlation between peak responses obtained from somata and axonal projections. (See Supplementary Table S1 for statistical analysis.)
- d.** Analysis of the response time to the peak in somata and axonal projections. A significant reduction in response latency was observed at axonal projections ( $47 \geq n \geq 24$  cells, from at least 5 different flies; see Supplementary Table S1 for statistical analysis.)
- e.** Correlation between the response time to the peak obtained at somata and axonal projections. Although responses at axonal projections are much faster, a high correlation was observed. (See Supplementary Table S1 for statistical analysis.)
- f.** Analysis of the response persistence in somata and axonal projections. The axonal responses decayed significantly faster than the soma responses. ( $47 \geq n \geq 24$  cells, from at least 5 different flies; see Supplementary Table S1 for statistical analysis.)
- g.** Correlation between the response persistence in somata and axonal projections. (See Supplementary Table S1 for statistical analysis.)

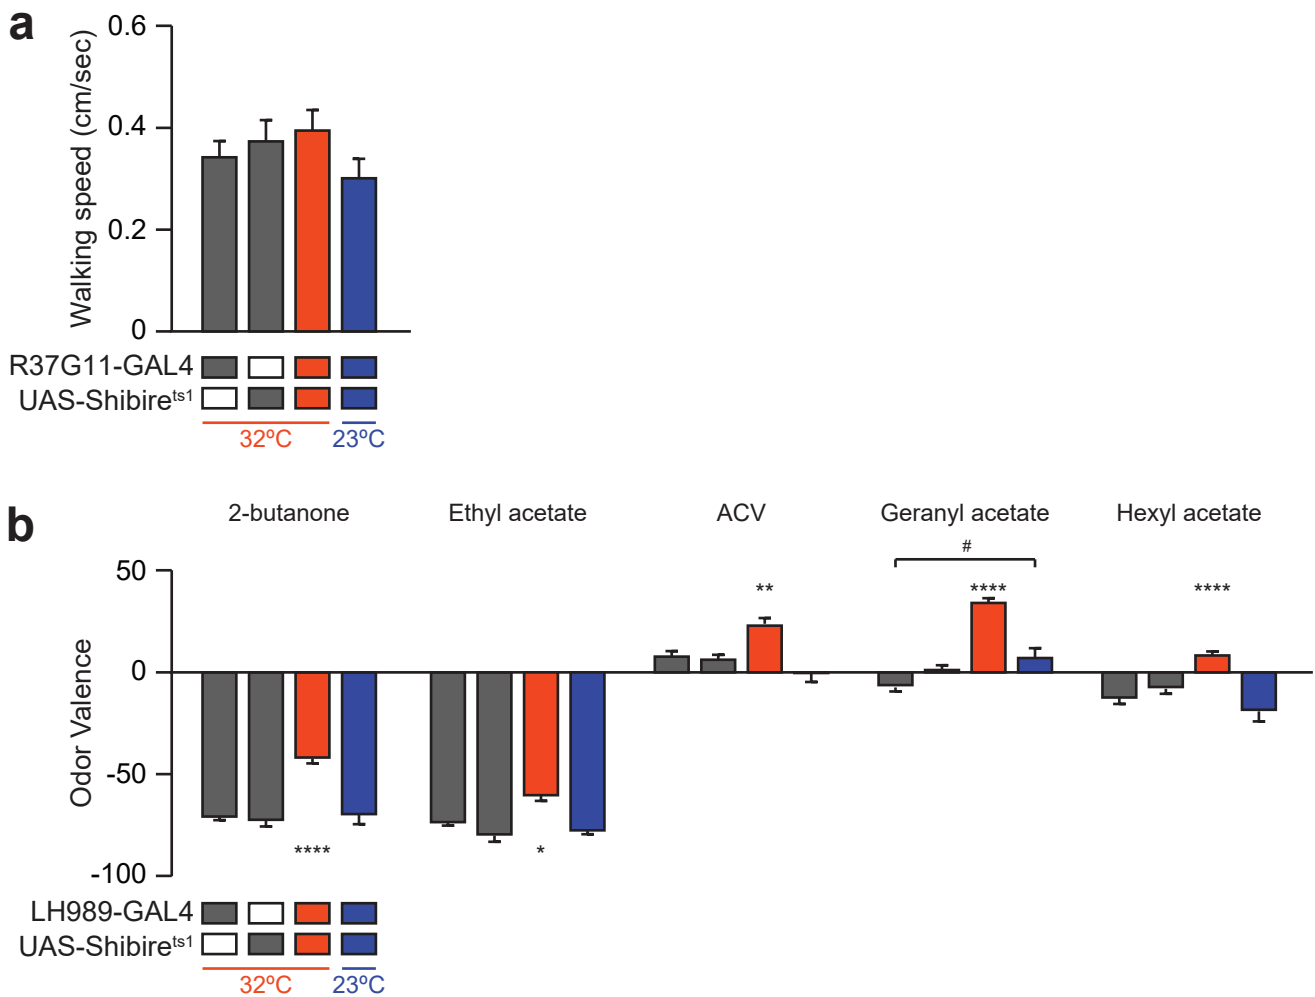

**Figure S4: Silencing PD2a1/b1 LHN with the sparse split-GAL4 LH989 has similar results as obtained with R37G11-GAL4 – controls for Fig 3**

**a.** Mean velocity scores during the 60 s prior to odor onset in the behavioral chamber. Gray, parental controls; red, the experimental group at 32 °C; blue, the experimental control group at 23 °C. No significant difference was observed. (67 ≥ n ≥ 32 flies; see Supplementary Table S1 for statistical analysis.)

**b.** Mean valence scores (see Methods) from experiments as in Fig. 3, for the designated odors using the sparser split-GAL4 driver line LH989. A consistent shift towards more positive valence values was observed during PD2a1/b1 inhibition (79 ≥ n ≥ 25 flies for all conditions, \* indicates a significant difference of the indicated group from all other groups according to a multiple comparison test. The lowest value of all multiple comparison tests is presented. # indicates a significant difference only between the two indicated groups. \*, # p < 0.05, \*\* p < 0.01, \*\*\*\* p < 0.0001, see Supplementary Table S1 for statistical analysis.)



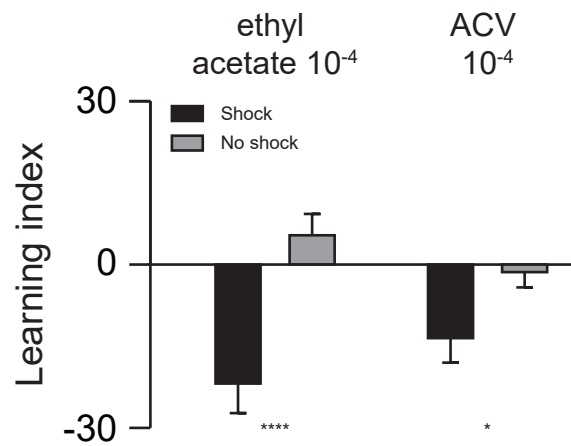

**Figure S5: Flies perceive low odor concentration – control for Fig 4**

Mean learning index (see Methods) for the designated odors. Flies show an aversion from both odors following conditioning. Control flies where mock training was used show no change in odor preference ( $66 \geq n \geq 45$  flies, \*  $p < 0.05$ , \*\*\*\*  $p < 0.0001$ ; see Supplementary Table S1 for statistical analysis).

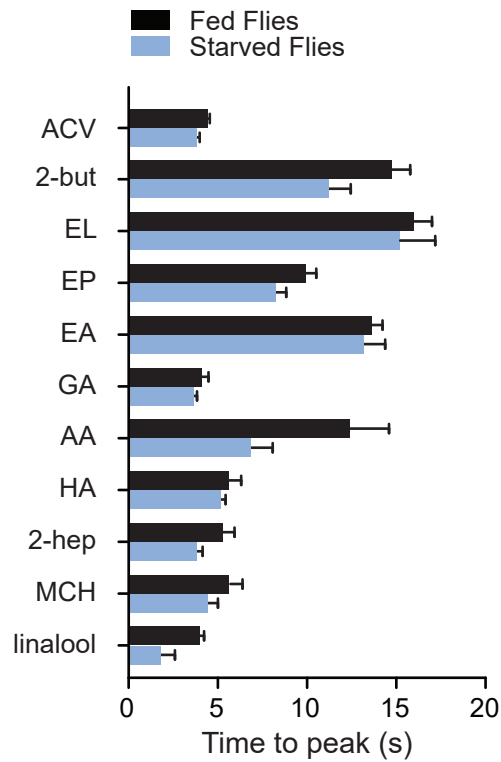

**Figure S6: Starvation does not affect PD2a1/b1 odor responses. An additional parameter for Fig 5**

Analysis of the time to peak of the response of the designated odors in fed (black) and starved (light blue) flies. A statistical difference was observed only with acetic acid ( $49 \geq n \geq 18$  cells, from at least 5 different flies; see Supplementary Table S1 for statistical analysis.)

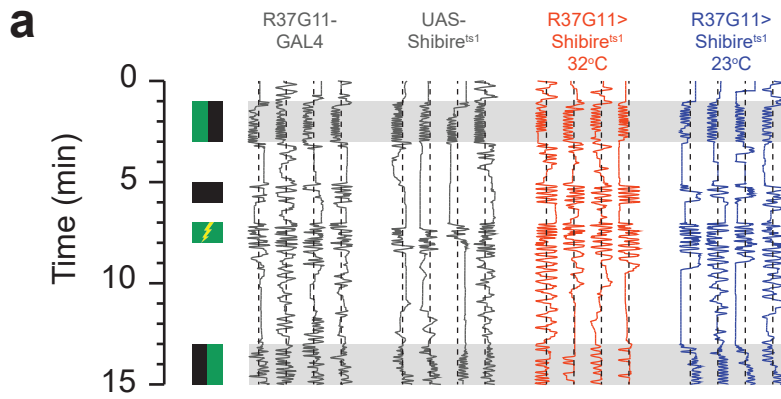

**b**

ethyl lactate vs. 2-butanone      geranyl acetate vs. ethyl lactate

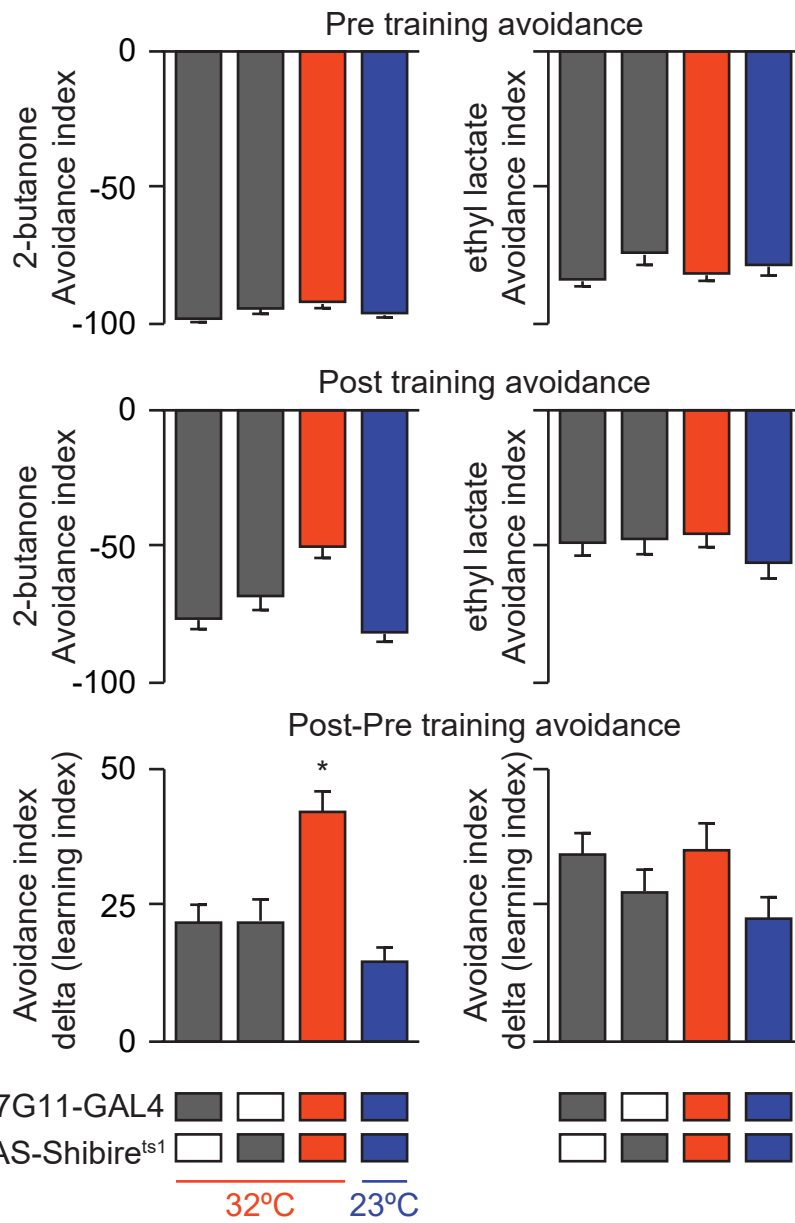

**Figure S7: PD2a1/b1 neurons contribute to aversive conditioning at high odor concentrations**

**a.** An example of traces obtained for conditioned flies. Ethyl lactate was used as the CS<sup>+</sup> and 2-butanone for the CS<sup>-</sup>. Gray, parental controls; red, the experimental group at 32 °C; blue, the experimental control group at 23 °C. Dashed lines indicate the center of the behavior chamber. Lack of a shift in odor preference was observed for controls, whereas a shift in odor preference was observed for the experimental group.

**b.** Mean odor avoidance from experiments as in A for the CS<sup>-</sup> odor (2-butanone in the 2-butanone/ethyl lactate pair and ethyl lactate in the ethyl lactate/geranyl acetate pair), before conditioning (*top*), following conditioning (middle), and the delta between the two measurements, also known as the learning index (bottom, see methods). Silencing PD2a1/b1 neurons before conditioning had no effect on the avoidance from the CS<sup>-</sup> in these two odor pairs. However, when silencing PD2a1/b1 neurons reduced avoidance of the CS<sup>-</sup>, 2-butanone, a large decrease in 2-butanone avoidance was observed following conditioning relative to parental and temperature controls. In the control experiment where silencing PD2a1/b1 neurons had no effect on the CS<sup>-</sup>, ethyl lactate, no improvement in ethyl lactate avoidance was observed following conditioning relative to parental and temperature controls. (92 ≥ n ≥ 33 flies; \* p<0.05; see Supplementary Table S1 for statistical analysis).

R37G11 > <sup>GFP</sup>Dsyd1::GFP,DenMark

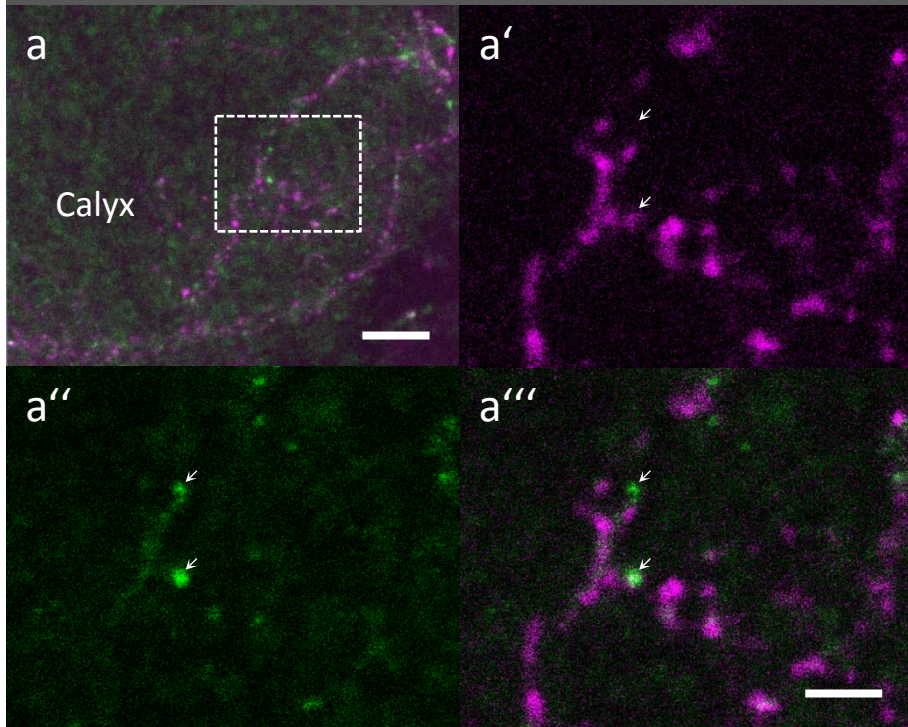

**Figure S8: PD2b1 neurites in the calyx display presynaptic sites**

**a:** Projection view of the synaptic site marker <sup>GFP</sup>Dsyd-1 (green) and the dendritic marker DenMark (magenta) under the control of R37G11-GAL4 in the calyx. The dashed box denotes the corresponding, same-lettered enlarged region. **a'-a'''**: Single optical section (0.5  $\mu$ m) shows putative presynaptic sites (arrows) of PD2b1 neurons in the calyx. Dendritic marker DenMark (**a'**, magenta), synaptic site marker <sup>GFP</sup>Dsyd-1 (**a''**, green) and overlay (**a'''**). Scale bars: **a**: 5  $\mu$ m; **a'-a'''**: 2  $\mu$ m.

R37G11 > CD8::GFP & ChAT-ir

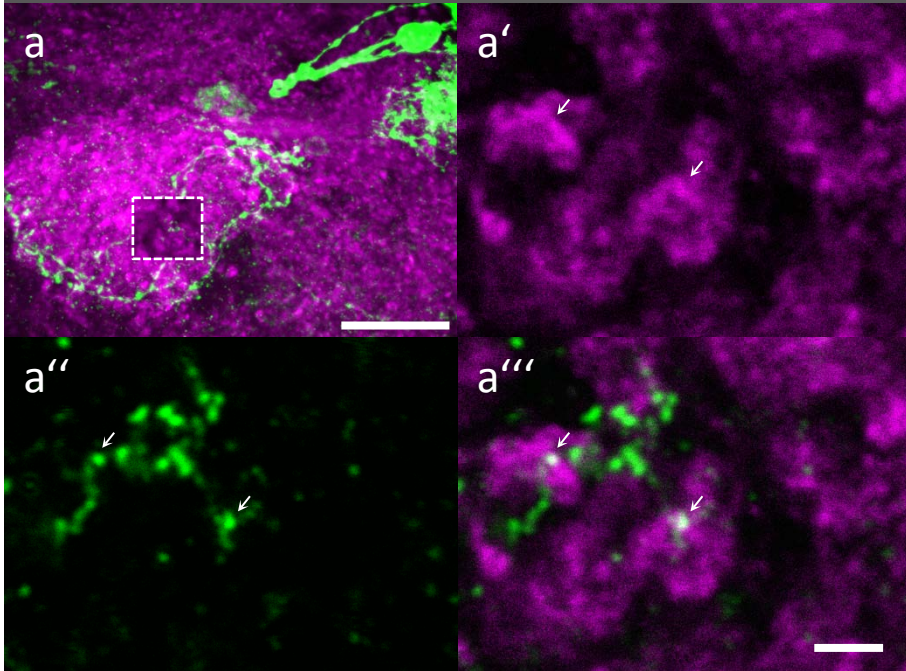

**Figure S9: PD2b1 neurons in the calyx colocalize with ChAT-immunofluorescence**

**a:** Projection view of CD8::GFP under the control of R37G11-GAL4 (green) and ChAT-ir (magenta) in the calyx. The dashed box denotes the corresponding, same-lettered enlarged region. **a'-a'''**: The single optical section (0.5  $\mu\text{m}$ ) reveals that ChAT-ir (**a'**, magenta) and R37G11-GAL4 neurites (**a''**, green) show overlap (**a'''**) in putative presynaptic sites (arrows) of PD2b1 neurons in the calyx. Scale bars: **a**: 20  $\mu\text{m}$ ; **a'-a'''**: 2  $\mu\text{m}$ .



**Table S1: Statistical analysis**

Statistical analysis for the data presented in Figs. 1-6 and Supplementary Figs. S2-S7

| Figure         | Data                 | Statistical method                                   | comparison                                 | P-value or adjusted P-value | Significance |
|----------------|----------------------|------------------------------------------------------|--------------------------------------------|-----------------------------|--------------|
| 1K             | Peak responses       | Pearson correlation                                  | 1. R37G11-GAL4<br>2. R48F03-GAL4           | <0.0001                     | ****         |
| 1L             | % responding cells   | Pearson correlation                                  | 1. R37G11-GAL4<br>2. R48F03-GAL4           | 0.0019                      | **           |
| 1M             | Response persistence | Pearson correlation                                  | 1. R37G11-GAL4<br>2. R48F03-GAL4           | <0.0001                     | ****         |
| 3B             | 2-Butanone           | One-way non parametric ANOVA - Kruskal's-Wallis test | 1. R37G11-GAL4                             | <0.0001                     | ****         |
|                |                      |                                                      | 2. UAS-Shi <sup>ts1</sup>                  |                             |              |
|                |                      |                                                      | 3. R37G11-GAL4> UAS-Shi <sup>ts1</sup> 23° |                             |              |
|                |                      |                                                      | 4. R37G11-GAL4> UAS-Shi <sup>ts1</sup> 32° |                             |              |
|                |                      | Dunn's multiple comparison test                      | 1. R37G11-GAL4                             | 0.608                       | N.S.         |
|                |                      |                                                      | 2. UAS-Shi <sup>ts1</sup>                  |                             |              |
|                |                      |                                                      | 1. R37G11-GAL4                             | >0.9999                     | N.S.         |
|                |                      |                                                      | 2. R37G11-GAL4> UAS-Shi <sup>ts1</sup> 23° |                             |              |
|                |                      |                                                      | 1. UAS-Shi <sup>ts1</sup>                  | 0.445                       | N.S.         |
|                |                      |                                                      | 2. R37G11-GAL4> UAS-Shi <sup>ts1</sup> 23° |                             |              |
|                |                      |                                                      | 1. R37G11-GAL4                             | <0.0001                     | ****         |
|                |                      |                                                      | 2. R37G11-GAL4> UAS-Shi <sup>ts1</sup> 32° |                             |              |
| Methyl Acetate |                      | One-way non parametric ANOVA - Kruskal's-Wallis test | 1. R37G11-GAL4                             | <0.0001                     | ****         |
|                |                      |                                                      | 2. UAS-Shi <sup>ts1</sup>                  |                             |              |
|                |                      |                                                      | 3. R37G11-GAL4> UAS-Shi <sup>ts1</sup> 23° |                             |              |
|                |                      |                                                      | 4. R37G11-GAL4> UAS-Shi <sup>ts1</sup> 32° |                             |              |
|                |                      | Dunn's multiple comparison test                      | 1. R37G11-GAL4                             | 0.024                       | *            |
|                |                      |                                                      | 2. UAS-Shi <sup>ts1</sup>                  |                             |              |
|                |                      |                                                      | 1. R37G11-GAL4                             | 0.146                       | N.S.         |
|                |                      |                                                      | 2. R37G11-GAL4> UAS-Shi <sup>ts1</sup> 23° |                             |              |
|                |                      |                                                      | 1. UAS-Shi <sup>ts1</sup>                  | >0.999                      | N.S.         |
|                |                      |                                                      | 2. R37G11-GAL4> UAS-Shi <sup>ts1</sup> 23° |                             |              |
|                |                      |                                                      | 1. R37G11-GAL4                             | 0.028                       | *            |
|                |                      |                                                      | 2. R37G11-GAL4> UAS-Shi <sup>ts1</sup> 32° |                             |              |
| Ethyl Acetate  |                      | One-way non parametric ANOVA - Kruskal's-Wallis test | 1. R37G11-GAL4                             | <0.0001                     | ****         |
|                |                      |                                                      | 2. UAS-Shi <sup>ts1</sup>                  |                             |              |
|                |                      |                                                      | 3. R37G11-GAL4> UAS-Shi <sup>ts1</sup> 23° |                             |              |
|                |                      |                                                      | 4. R37G11-GAL4> UAS-Shi <sup>ts1</sup> 32° |                             |              |
|                |                      | Dunn's multiple comparison test                      | 1. R37G11-GAL4                             | 0.255                       | N.S.         |
|                |                      |                                                      | 2. UAS-Shi <sup>ts1</sup>                  |                             |              |
|                |                      |                                                      | 1. R37G11-GAL4                             | 0.003                       | **           |
|                |                      |                                                      | 2. R37G11-GAL4> UAS-Shi <sup>ts1</sup> 23° |                             |              |
|                |                      |                                                      | 1. UAS-Shi <sup>ts1</sup>                  | >0.999                      | N.S.         |
|                |                      |                                                      | 2. R37G11-GAL4> UAS-Shi <sup>ts1</sup> 23° |                             |              |
|                |                      |                                                      | 1. R37G11-GAL4                             | 0.048                       | *            |
|                |                      |                                                      | 2. R37G11-GAL4> UAS-Shi <sup>ts1</sup> 32° |                             |              |

|                 |                                                         |    |                                          |         |      |
|-----------------|---------------------------------------------------------|----|------------------------------------------|---------|------|
|                 |                                                         | 2. | R37G11-GAL4> UAS-Shi <sup>ts1</sup> 32°  |         |      |
|                 |                                                         | 1. | UAS-Shi <sup>ts1</sup>                   | <0.0001 | **** |
|                 |                                                         | 2. | R37G11-GAL4> UAS-Shi <sup>ts1</sup> 32°  |         |      |
|                 |                                                         | 1. | R37G11-GAL4> UAS-Shi <sup>ts1</sup> 23°  | <0.0001 | **** |
|                 |                                                         | 2. | R37G11-GAL4> UAS-Shi <sup>ts1</sup> 32°  |         |      |
| Ethyl Lactate   | One-way non parametric ANOVA -<br>Kruskal's-Wallis test | 1. | R37G11-GAL4                              | 0.04    | *    |
|                 |                                                         | 2. | UAS-Shi <sup>ts1</sup>                   |         |      |
|                 |                                                         | 3. | R37G11-GAL4> UAS-Shi <sup>ts1</sup> 23°  |         |      |
|                 |                                                         | 4. | R37G11-GAL4> UAS-Shi <sup>ts1</sup> 32°  |         |      |
|                 |                                                         | 1. | R37G11-GAL4                              | 0.259   | N.S. |
|                 |                                                         | 2. | UAS-Shi <sup>ts1</sup>                   |         |      |
|                 |                                                         | 1. | R37G11-GAL4                              | >0.999  | N.S. |
|                 |                                                         | 2. | R37G11-GAL4> UAS-Shi <sup>ts1</sup> 23°  |         |      |
|                 |                                                         | 1. | UAS-Shi <sup>ts1</sup>                   | >0.999  | N.S. |
|                 |                                                         | 2. | R37G11-GAL4> UAS-Shi <sup>ts1</sup> 23°  |         |      |
|                 | Dunn's multiple comparison test                         | 1. | R37G11-GAL4                              | >0.999  | N.S. |
|                 |                                                         | 2. | R37G11-GAL4> UAS-Shi <sup>ts1</sup> 32°  |         |      |
|                 |                                                         | 1. | UAS-Shi <sup>ts1</sup>                   | 0.035   | *    |
|                 |                                                         | 2. | R37G11-GAL4> UAS-Shi <sup>ts1</sup> 32°  |         |      |
|                 |                                                         | 1. | R37G11-GAL4> UAS-Shi <sup>ts1</sup> 23°  | >0.999  | N.S. |
|                 |                                                         | 2. | R37G11-GAL4> UAS-Shi <sup>ts1</sup> 32°  |         |      |
| 2-Heptanone     | One-way non parametric ANOVA -<br>Kruskal's-Wallis test | 1. | R37G11-GAL4                              | 0.0001  | ***  |
|                 |                                                         | 2. | UAS-Shi <sup>ts1</sup>                   |         |      |
|                 |                                                         | 3. | R37G11-GAL4> UAS-Shi <sup>ts1</sup> 23°  |         |      |
|                 |                                                         | 4. | R37G11-GAL4> UAS-Shi <sup>ts1</sup> 32°  |         |      |
|                 |                                                         | 1. | R37G11-GAL4                              | 0.446   | N.S. |
|                 |                                                         | 2. | UAS-Shi <sup>ts1</sup>                   |         |      |
|                 |                                                         | 1. | R37G11-GAL4                              | >0.999  | N.S. |
|                 |                                                         | 2. | R37G11-GAL4> UAS-Shi <sup>ts1</sup> 23°  |         |      |
|                 |                                                         | 1. | UAS-Shi <sup>ts1</sup>                   | >0.999  | N.S. |
|                 |                                                         | 2. | R37G11-GAL4> UAS-Shi <sup>ts1</sup> 23°  |         |      |
|                 | Dunn's multiple comparison test                         | 1. | R37G11-GAL4                              | 0.027   | *    |
|                 |                                                         | 2. | R37G11-GAL4> UAS-Shi <sup>ts</sup> 32°   |         |      |
|                 |                                                         | 1. | UAS-Shi <sup>ts1</sup>                   | <0.0001 | **** |
|                 |                                                         | 2. | R37G11-GAL4> UAS-Shi <sup>ts1</sup> 32°  |         |      |
|                 |                                                         | 1. | R37G11-GAL4> UAS-Shi <sup>ts1</sup> 23°  | 0.018   | *    |
|                 |                                                         | 2. | R37G11-GAL4> UAS-Shi <sup>ts1</sup> 32°  |         |      |
| Hexyl Acetate   | One-way non parametric ANOVA -<br>Kruskal's-Wallis test | 1. | R37G11-GAL4                              | <0.0001 | **** |
|                 |                                                         | 2. | UAS-Shi <sup>ts1</sup>                   |         |      |
|                 |                                                         | 3. | R37G11-GAL4> UAS-Shi <sup>ts1</sup> 23°  |         |      |
|                 |                                                         | 4. | R37G11-GAL4> UAS-Shi <sup>ts1</sup> 32°  |         |      |
|                 |                                                         | 1. | R37G11-GAL4                              | 0.522   | N.S. |
|                 |                                                         | 2. | UAS-Shi <sup>ts1</sup>                   |         |      |
|                 |                                                         | 1. | R37G11-GAL4                              | >0.999  | N.S. |
|                 |                                                         | 2. | R37G11-GAL4> UAS- Shi <sup>ts1</sup> 23° |         |      |
|                 |                                                         | 1. | UAS- Shi <sup>ts1</sup>                  | >0.999  | N.S. |
|                 |                                                         | 2. | R37G11-GAL4> UAS- Shi <sup>ts1</sup> 23° |         |      |
|                 | Dunn's multiple comparison test                         | 1. | R37G11-GAL4                              | <0.0001 | **** |
|                 |                                                         | 2. | R37G11-GAL4> UAS- Shi <sup>ts1</sup> 32° |         |      |
|                 |                                                         | 1. | UAS- Shi <sup>ts1</sup>                  | 0.002   | **   |
|                 |                                                         | 2. | R37G11-GAL4> UAS- Shi <sup>ts1</sup> 32° |         |      |
|                 |                                                         | 1. | R37G11-GAL4> UAS- Shi <sup>ts1</sup> 23° | <0.0001 | **** |
|                 |                                                         | 2. | R37G11-GAL4> UAS- Shi <sup>ts1</sup> 32° |         |      |
| Geranyl acetate | One-way non parametric ANOVA -<br>Kruskal's-Wallis test | 1. | R37G11-GAL4                              | <0.0001 | **** |
|                 |                                                         | 2. | UAS- Shi <sup>ts1</sup>                  |         |      |
|                 |                                                         | 3. | R37G11-GAL4> UAS- Shi <sup>ts1</sup> 23° |         |      |
|                 |                                                         | 4. | R37G11-GAL4> UAS- Shi <sup>ts1</sup> 32° |         |      |

|           |                                                         |                                             |         |      |
|-----------|---------------------------------------------------------|---------------------------------------------|---------|------|
|           |                                                         | 1. R37G11-GAL4                              | >0.999  | N.S. |
|           |                                                         | 2. UAS- Shi <sup>ts1</sup>                  |         |      |
|           |                                                         | 1. R37G11-GAL4                              | >0.999  | N.S. |
|           |                                                         | 2. R37G11-GAL4> UAS- Shi <sup>ts1</sup> 23° |         |      |
|           |                                                         | 1. UAS- Shi <sup>ts1</sup>                  | 0.337   | N.S. |
|           |                                                         | 2. R37G11-GAL4> UAS- Shi <sup>ts1</sup> 23° |         |      |
|           | Dunn's multiple comparison test                         | 1. R37G11-GAL4                              | <0.0001 | **** |
|           |                                                         | 2. R37G11-GAL4> UAS- Shi <sup>ts1</sup> 32° |         |      |
|           |                                                         | 1. UAS- Shi <sup>ts1</sup>                  | <0.0001 | **** |
|           |                                                         | 2. R37G11-GAL4> UAS- Shi <sup>ts1</sup> 32° |         |      |
|           |                                                         | 1. R37G11-GAL4> UAS- Shi <sup>ts1</sup> 23° | 0.006   | **   |
|           |                                                         | 2. R37G11-GAL4> UAS- Shi <sup>ts1</sup> 32° |         |      |
| ACV       | One-way non parametric ANOVA -<br>Kruskal's-Wallis test | 1. R37G11-GAL4                              | <0.0001 | **** |
|           |                                                         | 2. UAS- Shi <sup>ts1</sup>                  |         |      |
|           |                                                         | 3. R37G11-GAL4> UAS- Shi <sup>ts1</sup> 23° |         |      |
|           |                                                         | 4. R37G11-GAL4> UAS- Shi <sup>ts1</sup> 32° |         |      |
|           |                                                         | 1. R37G11-GAL4                              | >0.999  | N.S. |
|           |                                                         | 2. UAS- Shi <sup>ts1</sup>                  |         |      |
|           |                                                         | 1. R37G11-GAL4                              | 0.056   | N.S. |
|           |                                                         | 2. R37G11-GAL4> UAS- Shi <sup>ts1</sup> 23° |         |      |
|           | Dunn's multiple comparison test                         | 1. UAS- Shi <sup>ts1</sup>                  | 0.825   | N.S. |
|           |                                                         | 2. R37G11-GAL4> UAS- Shi <sup>ts1</sup> 23° |         |      |
|           |                                                         | 1. R37G11-GAL4                              | <0.0001 | **** |
|           |                                                         | 2. R37G11-GAL4> UAS- Shi <sup>ts1</sup> 32° |         |      |
|           |                                                         | 1. UAS- Shi <sup>ts1</sup>                  | 0.001   | **   |
|           |                                                         | 2. R37G11-GAL4> UAS- Shi <sup>ts1</sup> 32° |         |      |
|           |                                                         | 1. R37G11-GAL4> UAS- Shi <sup>ts1</sup> 23° | <0.0001 | **** |
|           |                                                         | 2. R37G11-GAL4> UAS- Shi <sup>ts1</sup> 32° |         |      |
| MCH       | One-way non parametric ANOVA -<br>Kruskal's-Wallis test | 1. R37G11-GAL4                              | <0.0001 | **** |
|           |                                                         | 2. UAS- Shi <sup>ts1</sup>                  |         |      |
|           |                                                         | 3. R37G11-GAL4> UAS- Shi <sup>ts1</sup> 23° |         |      |
|           |                                                         | 4. R37G11-GAL4> UAS- Shi <sup>ts1</sup> 32° |         |      |
|           |                                                         | 1. R37G11-GAL4                              | >0.999  | N.S. |
|           |                                                         | 2. UAS- Shi <sup>ts1</sup>                  |         |      |
|           |                                                         | 1. R37G11-GAL4                              | <0.0001 | **** |
|           |                                                         | 2. R37G11-GAL4> UAS- Shi <sup>ts1</sup> 23° |         |      |
|           |                                                         | 1. UAS- Shi <sup>ts1</sup>                  | 0.001   | **   |
|           |                                                         | 2. R37G11-GAL4> UAS- Shi <sup>ts1</sup> 23° |         |      |
|           | Dunn's multiple comparison test                         | 1. R37G11-GAL4                              | >0.999  | N.S. |
|           |                                                         | 2. R37G11-GAL4> UAS- Shi <sup>ts1</sup> 32° |         |      |
|           |                                                         | 1. UAS- Shi <sup>ts1</sup>                  | >0.999  | N.S. |
|           |                                                         | 2. R37G11-GAL4> UAS- Shi <sup>ts1</sup> 32° |         |      |
|           |                                                         | 1. R37G11-GAL4> UAS- Shi <sup>ts1</sup> 23° | 0.0003  | ***  |
|           |                                                         | 2. R37G11-GAL4> UAS- Shi <sup>ts1</sup> 32° |         |      |
| 3-Octanol | One-way non parametric ANOVA -<br>Kruskal's-Wallis test | 1. R37G11-GAL4                              | <0.0001 | **** |
|           |                                                         | 2. UAS- Shi <sup>ts1</sup>                  |         |      |
|           |                                                         | 3. R37G11-GAL4> UAS- Shi <sup>ts1</sup> 23° |         |      |
|           |                                                         | 4. R37G11-GAL4> UAS- Shi <sup>ts1</sup> 32° |         |      |
|           |                                                         | 1. R37G11-GAL4                              | >0.999  | N.S. |
|           |                                                         | 2. UAS- Shi <sup>ts1</sup>                  |         |      |
|           |                                                         | 1. R37G11-GAL4                              | <0.0001 | **** |
|           |                                                         | 2. R37G11-GAL4> UAS- Shi <sup>ts1</sup> 23° |         |      |
|           | Dunn's multiple comparison test                         | 1. UAS- Shi <sup>ts1</sup>                  | 0.0004  | ***  |
|           |                                                         | 2. R37G11-GAL4> UAS- Shi <sup>ts1</sup> 23° |         |      |
|           |                                                         | 1. R37G11-GAL4                              | >0.999  | N.S. |
|           |                                                         | 2. R37G11-GAL4> UAS- Shi <sup>ts1</sup> 32° |         |      |
|           |                                                         | 1. UAS- Shi <sup>ts1</sup>                  | 0.21    | N.S. |

|                                             |                                                      |                                                  |                                             |                 |                                                      |                            |         |      |
|---------------------------------------------|------------------------------------------------------|--------------------------------------------------|---------------------------------------------|-----------------|------------------------------------------------------|----------------------------|---------|------|
|                                             |                                                      |                                                  | 2. R37G11-GAL4> UAS- Shi <sup>ts1</sup> 32° |                 |                                                      |                            |         |      |
|                                             |                                                      |                                                  | 1. R37G11-GAL4> UAS- Shi <sup>ts1</sup> 23° | <0.0001         | ****                                                 |                            |         |      |
|                                             |                                                      |                                                  | 2. R37G11-GAL4> UAS- Shi <sup>ts1</sup> 32° |                 |                                                      |                            |         |      |
| Ethyl benzoate                              | One-way non parametric ANOVA - Kruskal's-Wallis test | 1. R37G11-GAL4                                   |                                             | 0.002           | **                                                   |                            |         |      |
|                                             |                                                      | 2. UAS- Shi <sup>ts1</sup>                       |                                             |                 |                                                      |                            |         |      |
|                                             |                                                      | 3. R37G11-GAL4> UAS- Shi <sup>ts1</sup> 23°      |                                             |                 |                                                      |                            |         |      |
|                                             |                                                      | 4. R37G11-GAL4> UAS- Shi <sup>ts1</sup> 32°      |                                             |                 |                                                      |                            |         |      |
|                                             | Dunn's multiple comparison test                      | 1. R37G11-GAL4                                   |                                             | >0.999          | N.S.                                                 |                            |         |      |
|                                             |                                                      | 2. UAS- Shi <sup>ts1</sup>                       |                                             |                 |                                                      |                            |         |      |
|                                             |                                                      | 1. R37G11-GAL4                                   |                                             | 0.196           | N.S.                                                 |                            |         |      |
|                                             |                                                      | 2. R37G11-GAL4> UAS- Shi <sup>ts1</sup> 23°      |                                             |                 |                                                      |                            |         |      |
|                                             |                                                      | 1. UAS- Shi <sup>ts1</sup>                       |                                             | 0.013           | *                                                    |                            |         |      |
|                                             |                                                      | 2. R37G11-GAL4> UAS- Shi <sup>ts1</sup> 23°      |                                             |                 |                                                      |                            |         |      |
|                                             |                                                      | 1. R37G11-GAL4                                   |                                             | 0.717           | N.S.                                                 |                            |         |      |
|                                             |                                                      | 2. R37G11-GAL4> UAS- Shi <sup>ts1</sup> 32°      |                                             |                 |                                                      |                            |         |      |
|                                             |                                                      | 1. UAS- Shi <sup>ts1</sup>                       |                                             | >0.999          | N.S.                                                 |                            |         |      |
|                                             |                                                      | 2. R37G11-GAL4> UAS- Shi <sup>ts1</sup> 32°      |                                             |                 |                                                      |                            |         |      |
| 1. R37G11-GAL4> UAS- Shi <sup>ts1</sup> 23° |                                                      | 0.002                                            | **                                          |                 |                                                      |                            |         |      |
| 2. R37G11-GAL4> UAS- Shi <sup>ts1</sup> 32° |                                                      |                                                  |                                             |                 |                                                      |                            |         |      |
| 1-Hexanol                                   | One-way non parametric ANOVA - Kruskal's-Wallis test | 1. R37G11-GAL4                                   |                                             | 0.0002          | ***                                                  |                            |         |      |
|                                             |                                                      | 2. UAS- Shi <sup>ts1</sup>                       |                                             |                 |                                                      |                            |         |      |
|                                             |                                                      | 3. R37G11-GAL4> UAS- Shi <sup>ts1</sup> 23°      |                                             |                 |                                                      |                            |         |      |
|                                             |                                                      | 4. R37G11-GAL4> UAS- Shi <sup>ts1</sup> 32°      |                                             |                 |                                                      |                            |         |      |
|                                             | Dunn's multiple comparison test                      | 1. R37G11-GAL4                                   |                                             | 0.0004          | ***                                                  |                            |         |      |
|                                             |                                                      | 2. UAS- Shi <sup>ts1</sup>                       |                                             |                 |                                                      |                            |         |      |
|                                             |                                                      | 1. R37G11-GAL4                                   |                                             | >0.999          | N.S.                                                 |                            |         |      |
|                                             |                                                      | 2. R37G11-GAL4> UAS- Shi <sup>ts1</sup> 23°      |                                             |                 |                                                      |                            |         |      |
|                                             |                                                      | 1. UAS- Shi <sup>ts1</sup>                       |                                             | 0.003           | **                                                   |                            |         |      |
|                                             |                                                      | 2. R37G11-GAL4> UAS- Shi <sup>ts1</sup> 23°      |                                             |                 |                                                      |                            |         |      |
|                                             |                                                      | 1. R37G11-GAL4                                   |                                             | 0.067           | N.S.                                                 |                            |         |      |
|                                             |                                                      | 2. R37G11-GAL4> UAS- Shi <sup>ts1</sup> 32°      |                                             |                 |                                                      |                            |         |      |
|                                             |                                                      | 1. UAS- Shi <sup>ts1</sup>                       |                                             | 0.49            | N.S.                                                 |                            |         |      |
|                                             |                                                      | 2. R37G11-GAL4> UAS- Shi <sup>ts1</sup> 32°      |                                             |                 |                                                      |                            |         |      |
| 1. R37G11-GAL4> UAS- Shi <sup>ts1</sup> 23° |                                                      | 0.318                                            | N.S.                                        |                 |                                                      |                            |         |      |
| 2. R37G11-GAL4> UAS- Shi <sup>ts1</sup> 32° |                                                      |                                                  |                                             |                 |                                                      |                            |         |      |
| 4B                                          | Peak response ΔF/F                                   | Multiple t-test with Sidak-Bonferroni correction | 1. HA 1X10 <sup>-2</sup>                    | 0.43            | N.S.                                                 |                            |         |      |
|                                             |                                                      |                                                  | 2. HA 5X10 <sup>-2</sup>                    |                 |                                                      |                            |         |      |
|                                             |                                                      |                                                  | 1. 2-hep 1X10 <sup>-2</sup>                 | 0.04            | *                                                    |                            |         |      |
|                                             |                                                      |                                                  | 2. 2-hep 5X10 <sup>-2</sup>                 |                 |                                                      |                            |         |      |
|                                             |                                                      |                                                  | 1. GA 1X10 <sup>-2</sup>                    | 0.55            | N.S.                                                 |                            |         |      |
|                                             |                                                      |                                                  | 2. GA 5X10 <sup>-2</sup>                    |                 |                                                      |                            |         |      |
|                                             |                                                      |                                                  | 1. EA 1X10 <sup>-2</sup>                    | 0.08            | N.S.                                                 |                            |         |      |
|                                             |                                                      |                                                  | 2. EA 5X10 <sup>-2</sup>                    |                 |                                                      |                            |         |      |
|                                             |                                                      |                                                  | 1. ACV 1X10 <sup>-2</sup>                   | 0.003           | **                                                   |                            |         |      |
|                                             |                                                      |                                                  | 2. ACV 5X10 <sup>-2</sup>                   |                 |                                                      |                            |         |      |
|                                             |                                                      |                                                  | 1. 2-butanone 1X10 <sup>-2</sup>            | 0.24            | N.S.                                                 |                            |         |      |
|                                             |                                                      |                                                  | 2. 2-butanone 5X10 <sup>-2</sup>            |                 |                                                      |                            |         |      |
|                                             |                                                      |                                                  | 4C                                          | 2-butanone 10-3 | One-way non parametric ANOVA - Kruskal's-Wallis test | 1. R37G11-GAL4             | <0.0001 | **** |
|                                             |                                                      |                                                  |                                             |                 |                                                      | 2. UAS- Shi <sup>ts1</sup> |         |      |
| 3. R37G11-GAL4> UAS- Shi <sup>ts1</sup> 23° |                                                      |                                                  |                                             |                 |                                                      |                            |         |      |
| 4. R37G11-GAL4> UAS- Shi <sup>ts1</sup> 32° |                                                      |                                                  |                                             |                 |                                                      |                            |         |      |
| Dunn's multiple comparison test             | 1. R37G11-GAL4                                       |                                                  |                                             | 0.03            | *                                                    |                            |         |      |
|                                             | 2. UAS- Shi <sup>ts1</sup>                           |                                                  |                                             |                 |                                                      |                            |         |      |
|                                             | 1. R37G11-GAL4                                       |                                                  |                                             | <0.0001         | ****                                                 |                            |         |      |
|                                             | 2. R37G11-GAL4> UAS- Shi <sup>ts1</sup> 23°          |                                                  |                                             |                 |                                                      |                            |         |      |
|                                             | 1. UAS- Shi <sup>ts1</sup>                           |                                                  |                                             | 0.1             | N.S.                                                 |                            |         |      |
|                                             | 2. R37G11-GAL4> UAS- Shi <sup>ts1</sup> 23°          |                                                  |                                             |                 |                                                      |                            |         |      |

|                            |                                                         |    |                                          |         |      |
|----------------------------|---------------------------------------------------------|----|------------------------------------------|---------|------|
|                            |                                                         | 1. | R37G11-GAL4                              | 0.02    | *    |
|                            |                                                         | 2. | R37G11-GAL4> UAS- Shi <sup>ts1</sup> 32° |         |      |
|                            |                                                         | 1. | UAS- Shi <sup>ts1</sup>                  | >0.999  | N.S. |
|                            |                                                         | 2. | R37G11-GAL4> UAS- Shi <sup>ts1</sup> 32° |         |      |
|                            |                                                         | 1. | R37G11-GAL4> UAS- Shi <sup>ts1</sup> 23° | 0.19    | N.S. |
|                            |                                                         | 2. | R37G11-GAL4> UAS- Shi <sup>ts1</sup> 32° |         |      |
| 2-butanone<br>10-4         | One-way non parametric ANOVA -<br>Kruskal's-Wallis test | 1. | R37G11-GAL4                              | 0.01    | *    |
|                            |                                                         | 2. | UAS- Shi <sup>ts1</sup>                  |         |      |
|                            |                                                         | 3. | R37G11-GAL4> UAS- Shi <sup>ts1</sup> 23° |         |      |
|                            |                                                         | 4. | R37G11-GAL4> UAS- Shi <sup>ts1</sup> 32° |         |      |
|                            |                                                         | 1. | R37G11-GAL4                              | >0.999  | N.S. |
|                            |                                                         | 2. | UAS- Shi <sup>ts1</sup>                  |         |      |
|                            |                                                         | 1. | R37G11-GAL4                              | 0.01    | *    |
|                            |                                                         | 2. | R37G11-GAL4> UAS- Shi <sup>ts1</sup> 23° |         |      |
|                            | Dunn's multiple comparison test                         | 1. | UAS- Shi <sup>ts1</sup>                  | 0.04    | *    |
|                            |                                                         | 2. | R37G11-GAL4> UAS- Shi <sup>ts1</sup> 23° |         |      |
|                            |                                                         | 1. | R37G11-GAL4                              | 0.46    | N.S. |
|                            |                                                         | 2. | R37G11-GAL4> UAS- Shi <sup>ts1</sup> 32° |         |      |
|                            |                                                         | 1. | UAS- Shi <sup>ts1</sup>                  | >0.999  | N.S. |
|                            |                                                         | 2. | R37G11-GAL4> UAS- Shi <sup>ts1</sup> 32° |         |      |
|                            |                                                         | 1. | R37G11-GAL4> UAS- Shi <sup>ts1</sup> 23° | 0.66    | N.S. |
|                            |                                                         | 2. | R37G11-GAL4> UAS- Shi <sup>ts1</sup> 32° |         |      |
| Ethyl acetate<br>10-3      | One-way non parametric ANOVA -<br>Kruskal's-Wallis test | 1. | R37G11-GAL4                              | 0.002   | **   |
|                            |                                                         | 2. | UAS- Shi <sup>ts1</sup>                  |         |      |
|                            |                                                         | 3. | R37G11-GAL4> UAS- Shi <sup>ts1</sup> 23° |         |      |
|                            |                                                         | 4. | R37G11-GAL4> UAS- Shi <sup>ts1</sup> 32° |         |      |
|                            |                                                         | 1. | R37G11-GAL4                              | >0.999  | N.S. |
|                            |                                                         | 2. | UAS- Shi <sup>ts1</sup>                  |         |      |
|                            |                                                         | 1. | R37G11-GAL4                              | 0.09    | N.S. |
|                            |                                                         | 2. | R37G11-GAL4> UAS- Shi <sup>ts1</sup> 23° |         |      |
|                            |                                                         | 1. | UAS- Shi <sup>ts1</sup>                  | 0.23    | N.S. |
|                            |                                                         | 2. | R37G11-GAL4> UAS- Shi <sup>ts1</sup> 23° |         |      |
|                            | Dunn's multiple comparison test                         | 1. | R37G11-GAL4                              | >0.999  | N.S. |
|                            |                                                         | 2. | R37G11-GAL4> UAS- Shi <sup>ts1</sup> 32° |         |      |
|                            |                                                         | 1. | UAS- Shi <sup>ts1</sup>                  | 0.5     | N.S. |
|                            |                                                         | 2. | R37G11-GAL4> UAS- Shi <sup>ts1</sup> 32° |         |      |
|                            |                                                         | 1. | R37G11-GAL4> UAS- Shi <sup>ts1</sup> 23° | 0.001   | ***  |
|                            |                                                         | 2. | R37G11-GAL4> UAS- Shi <sup>ts1</sup> 32° |         |      |
| Ethyl acetate<br>10-4      | One-way non parametric ANOVA -<br>Kruskal's-Wallis test | 1. | R37G11-GAL4                              | <0.0001 | **** |
|                            |                                                         | 2. | UAS- Shi <sup>ts1</sup>                  |         |      |
|                            |                                                         | 3. | R37G11-GAL4> UAS- Shi <sup>ts1</sup> 23° |         |      |
|                            |                                                         | 4. | R37G11-GAL4> UAS- Shi <sup>ts1</sup> 32° |         |      |
|                            |                                                         | 1. | R37G11-GAL4                              | 0.29    | N.S. |
|                            |                                                         | 2. | UAS- Shi <sup>ts1</sup>                  |         |      |
|                            |                                                         | 1. | R37G11-GAL4                              | 0.055   | N.S. |
|                            |                                                         | 2. | R37G11-GAL4> UAS- Shi <sup>ts1</sup> 23° |         |      |
|                            |                                                         | 1. | UAS- Shi <sup>ts1</sup>                  | <0.0001 | **** |
|                            |                                                         | 2. | R37G11-GAL4> UAS- Shi <sup>ts1</sup> 23° |         |      |
|                            | Dunn's multiple comparison test                         | 1. | R37G11-GAL4                              | >0.999  | N.S. |
|                            |                                                         | 2. | R37G11-GAL4> UAS- Shi <sup>ts1</sup> 32° |         |      |
|                            |                                                         | 1. | UAS- Shi <sup>ts1</sup>                  | 0.22    | N.S. |
|                            |                                                         | 2. | R37G11-GAL4> UAS- Shi <sup>ts1</sup> 32° |         |      |
|                            |                                                         | 1. | R37G11-GAL4> UAS- Shi <sup>ts1</sup> 23° | 0.02    | *    |
|                            |                                                         | 2. | R37G11-GAL4> UAS- Shi <sup>ts1</sup> 32° |         |      |
| Geranyl<br>acetate<br>10-3 | One-way non parametric ANOVA -<br>Kruskal's-Wallis test | 1. | R37G11-GAL4                              | 0.84    | N.S. |
|                            |                                                         | 2. | UAS- Shi <sup>ts1</sup>                  |         |      |
|                            |                                                         | 3. | R37G11-GAL4> UAS- Shi <sup>ts1</sup> 23° |         |      |
|                            |                                                         | 4. | R37G11-GAL4> UAS- Shi <sup>ts1</sup> 32° |         |      |

|                      |                                                               |                        |                                                                    |         |      |
|----------------------|---------------------------------------------------------------|------------------------|--------------------------------------------------------------------|---------|------|
| Geranyl acetate 10-4 | One-way non parametric ANOVA - Kruskal's-Wallis test          | 1.                     | R37G11-GAL4                                                        | 0.007   | **   |
|                      |                                                               | 2.                     | UAS- Shi <sup>ts1</sup>                                            |         |      |
|                      |                                                               | 3.                     | R37G11-GAL4> UAS- Shi <sup>ts1</sup> 23°                           |         |      |
|                      |                                                               | 4.                     | R37G11-GAL4> UAS- Shi <sup>ts1</sup> 32°                           |         |      |
|                      | Dunn's multiple comparison test                               | 1.                     | R37G11-GAL4                                                        | 0.07    | N.S. |
|                      |                                                               | 2.                     | UAS- Shi <sup>ts1</sup>                                            |         |      |
|                      |                                                               | 1.                     | R37G11-GAL4                                                        | >0.999  | N.S. |
|                      |                                                               | 2.                     | R37G11-GAL4> UAS- Shi <sup>ts1</sup> 23°                           |         |      |
|                      |                                                               | 1.                     | UAS- Shi <sup>ts1</sup>                                            | 0.02    | *    |
|                      |                                                               | 2.                     | R37G11-GAL4> UAS- Shi <sup>ts1</sup> 23°                           |         |      |
|                      |                                                               | 1.                     | R37G11-GAL4                                                        | 0.44    | N.S. |
|                      |                                                               | 2.                     | R37G11-GAL4> UAS- Shi <sup>ts1</sup> 32°                           |         |      |
|                      |                                                               | 1.                     | UAS- Shi <sup>ts1</sup>                                            | >0.999  | N.S. |
|                      |                                                               | 2.                     | R37G11-GAL4> UAS- Shi <sup>ts1</sup> 32°                           |         |      |
| 1.                   | R37G11-GAL4> UAS- Shi <sup>ts1</sup> 23°                      | 0.16                   | N.S.                                                               |         |      |
| 2.                   | R37G11-GAL4> UAS- Shi <sup>ts1</sup> 32°                      |                        |                                                                    |         |      |
| ACV 10-3             | One-way non parametric ANOVA - Kruskal's-Wallis test          | 1.                     | R37G11-GAL4                                                        | 0.0003  | ***  |
|                      |                                                               | 2.                     | UAS- Shi <sup>ts1</sup>                                            |         |      |
|                      |                                                               | 3.                     | R37G11-GAL4> UAS- Shi <sup>ts1</sup> 23°                           |         |      |
|                      |                                                               | 4.                     | R37G11-GAL4> UAS- Shi <sup>ts1</sup> 32°                           |         |      |
|                      | Dunn's multiple comparison test                               | 1.                     | R37G11-GAL4                                                        | >0.999  | N.S. |
|                      |                                                               | 2.                     | UAS- Shi <sup>ts1</sup>                                            |         |      |
|                      |                                                               | 1.                     | R37G11-GAL4                                                        | >0.999  | N.S. |
|                      |                                                               | 2.                     | R37G11-GAL4> UAS- Shi <sup>ts1</sup> 23°                           |         |      |
|                      |                                                               | 1.                     | UAS- Shi <sup>ts1</sup>                                            | >0.999  | N.S. |
|                      |                                                               | 2.                     | R37G11-GAL4> UAS- Shi <sup>ts1</sup> 23°                           |         |      |
|                      |                                                               | 1.                     | R37G11-GAL4                                                        | 0.02    | *    |
|                      |                                                               | 2.                     | R37G11-GAL4> UAS- Shi <sup>ts1</sup> 32°                           |         |      |
|                      |                                                               | 1.                     | UAS- Shi <sup>ts1</sup>                                            | 0.002   | **   |
|                      |                                                               | 2.                     | R37G11-GAL4> UAS- Shi <sup>ts1</sup> 32°                           |         |      |
| 1.                   | R37G11-GAL4> UAS- Shi <sup>ts1</sup> 23°                      | 0.002                  | **                                                                 |         |      |
| 2.                   | R37G11-GAL4> UAS- Shi <sup>ts1</sup> 32°                      |                        |                                                                    |         |      |
| ACV 10-4             | One-way non parametric ANOVA - Kruskal's-Wallis test          | 1.                     | R37G11-GAL4                                                        | 0.002   | **   |
|                      |                                                               | 2.                     | UAS- Shi <sup>ts1</sup>                                            |         |      |
|                      |                                                               | 3.                     | R37G11-GAL4> UAS- Shi <sup>ts1</sup> 23°                           |         |      |
|                      |                                                               | 4.                     | R37G11-GAL4> UAS- Shi <sup>ts1</sup> 32°                           |         |      |
|                      | Dunn's multiple comparison test                               | 1.                     | R37G11-GAL4                                                        | >0.999  | N.S. |
|                      |                                                               | 2.                     | UAS- Shi <sup>ts1</sup>                                            |         |      |
|                      |                                                               | 1.                     | R37G11-GAL4                                                        | 0.01    | *    |
|                      |                                                               | 2.                     | R37G11-GAL4> UAS- Shi <sup>ts1</sup> 23°                           |         |      |
|                      |                                                               | 1.                     | UAS- Shi <sup>ts1</sup>                                            | 0.005   | **   |
|                      |                                                               | 2.                     | R37G11-GAL4> UAS- Shi <sup>ts1</sup> 23°                           |         |      |
|                      |                                                               | 1.                     | R37G11-GAL4                                                        | >0.999  | N.S. |
|                      |                                                               | 2.                     | R37G11-GAL4> UAS- Shi <sup>ts1</sup> 32°                           |         |      |
|                      |                                                               | 1.                     | UAS- Shi <sup>ts1</sup>                                            | >0.999  | N.S. |
|                      |                                                               | 2.                     | R37G11-GAL4> UAS- Shi <sup>ts1</sup> 32°                           |         |      |
| 1.                   | R37G11-GAL4> UAS- Shi <sup>ts1</sup> 23°                      | 0.01                   | *                                                                  |         |      |
| 2.                   | R37G11-GAL4> UAS- Shi <sup>ts1</sup> 32°                      |                        |                                                                    |         |      |
| 4D                   | Peak response $\Delta F/F$ Vs. $ \Delta \text{odor valence} $ | Pearson correlation    | 1. Peak response $\Delta F/F$<br>2. $ \Delta \text{odor valence} $ | 0.36    | N.S. |
| 5B                   | Peak responses                                                | Two-way ordinary ANOVA | Interaction                                                        | 0.31    | N.S. |
|                      |                                                               |                        | Main effect of odor                                                | <0.0001 | **** |

|                       |                                                      |                                                      |                                                                                                                                            |         |      |
|-----------------------|------------------------------------------------------|------------------------------------------------------|--------------------------------------------------------------------------------------------------------------------------------------------|---------|------|
|                       |                                                      |                                                      | Main effect of condition (Fed Vs starved)                                                                                                  | 0.35    | N.S. |
| Responses persistence | Two-way ordinary ANOVA                               |                                                      | Interaction                                                                                                                                | 0.0006  | ***  |
|                       |                                                      |                                                      | Main effect of odor                                                                                                                        | <0.0001 | **** |
|                       |                                                      |                                                      | Main effect of condition (Fed Vs starved)                                                                                                  | 0.71    | N.S. |
| 5C                    | 2-Heptanone                                          | One-way non parametric ANOVA - Kruskal's-Wallis test | 1. R37G11-GAL4<br>2. UAS- Shi <sup>ts1</sup><br>3. R37G11-GAL4> UAS- Shi <sup>ts1</sup> 23°<br>4. R37G11-GAL4> UAS- Shi <sup>ts1</sup> 32° | <0.0001 | **** |
|                       |                                                      | Dunn's multiple comparison test                      | 1. R37G11-GAL4<br>2. UAS- Shi <sup>ts1</sup>                                                                                               | 0.866   | N.S. |
|                       |                                                      |                                                      | 1. R37G11-GAL4<br>2. R37G11-GAL4> UAS- Shi <sup>ts1</sup> 23°                                                                              | 0.0001  | ***  |
|                       |                                                      |                                                      | 1. UAS- Shi <sup>ts1</sup><br>2. R37G11-GAL4> UAS- Shi <sup>ts1</sup> 23°                                                                  | <0.0001 | **** |
|                       |                                                      |                                                      | 1. R37G11-GAL4<br>2. R37G11-GAL4> UAS- Shi <sup>ts1</sup> 32°                                                                              | >0.999  | N.S. |
|                       |                                                      |                                                      | 1. UAS- Shi <sup>ts1</sup><br>2. R37G11-GAL4> UAS- Shi <sup>ts1</sup> 32°                                                                  | >0.999  | N.S. |
|                       |                                                      |                                                      | 1. R37G11-GAL4> UAS- Shi <sup>ts1</sup> 23°<br>2. R37G11-GAL4> UAS- Shi <sup>ts1</sup> 32°                                                 | <0.0001 | **** |
| Hexyl Acetate         | One-way non parametric ANOVA - Kruskal's-Wallis test |                                                      | 1. R37G11-GAL4<br>2. UAS- Shi <sup>ts1</sup><br>3. R37G11-GAL4> UAS- Shi <sup>ts1</sup> 23°<br>4. R37G11-GAL4> UAS- Shi <sup>ts1</sup> 32° | 0.054   | N.S. |
| ACV                   | One-way non parametric ANOVA - Kruskal's-Wallis test |                                                      | 1. R37G11-GAL4<br>2. UAS- Shi <sup>ts1</sup><br>3. R37G11-GAL4> UAS- Shi <sup>ts1</sup> 23°<br>4. R37G11-GAL4> UAS- Shi <sup>ts1</sup> 32° | 0.18    | N.S. |
| Geranyl acetate       | One-way non parametric ANOVA - Kruskal's-Wallis test |                                                      | 1. R37G11-GAL4<br>2. UAS- Shi <sup>ts1</sup><br>3. R37G11-GAL4> UAS- Shi <sup>ts1</sup> 23°<br>4. R37G11-GAL4> UAS- Shi <sup>ts1</sup> 32° | 0.008   | **   |
|                       |                                                      | Dunn's multiple comparison test                      | 1. R37G11-GAL4<br>2. UAS- Shi <sup>ts1</sup>                                                                                               | 0.51    | N.S. |
|                       |                                                      |                                                      | 1. R37G11-GAL4<br>2. R37G11-GAL4> UAS- Shi <sup>ts1</sup> 23°                                                                              | >0.999  | N.S. |
|                       |                                                      |                                                      | 1. UAS- Shi <sup>ts1</sup><br>2. R37G11-GAL4> UAS- Shi <sup>ts1</sup> 23°                                                                  | 0.01    | *    |
|                       |                                                      |                                                      | 1. R37G11-GAL4<br>2. R37G11-GAL4> UAS- Shi <sup>ts1</sup> 32°                                                                              | >0.999  | N.S. |
|                       |                                                      |                                                      | 1. UAS- Shi <sup>ts1</sup><br>2. R37G11-GAL4> UAS- Shi <sup>ts1</sup> 32°                                                                  | 0.03    | *    |
|                       |                                                      |                                                      | 1. R37G11-GAL4> UAS- Shi <sup>ts1</sup> 23°<br>2. R37G11-GAL4> UAS- Shi <sup>ts1</sup> 32°                                                 | >0.999  | N.S. |
| 2-butanone            | One-way non parametric ANOVA - Kruskal's-Wallis test |                                                      | 1. R37G11-GAL4<br>2. UAS- Shi <sup>ts1</sup><br>3. R37G11-GAL4> UAS- Shi <sup>ts1</sup> 23°<br>4. R37G11-GAL4> UAS- Shi <sup>ts1</sup> 32° | <0.0001 | **** |
|                       |                                                      | Dunn's multiple comparison test                      | 1. R37G11-GAL4<br>2. UAS- Shi <sup>ts1</sup>                                                                                               | 0.21    | N.S. |
|                       |                                                      |                                                      | 1. R37G11-GAL4<br>2. R37G11-GAL4> UAS- Shi <sup>ts1</sup> 23°                                                                              | 0.009   | **   |

|                |                                                         |                                                         |                                             |         |      |
|----------------|---------------------------------------------------------|---------------------------------------------------------|---------------------------------------------|---------|------|
|                |                                                         |                                                         | 1. UAS- Shi <sup>ts1</sup>                  | <0.0001 | **** |
|                |                                                         |                                                         | 2. R37G11-GAL4> UAS- Shi <sup>ts1</sup> 23° |         |      |
|                |                                                         |                                                         | 1. R37G11-GAL4                              | 0.005   | **   |
|                |                                                         |                                                         | 2. R37G11-GAL4> UAS- Shi <sup>ts1</sup> 32° |         |      |
|                |                                                         |                                                         | 1. UAS- Shi <sup>ts1</sup>                  | <0.0001 | **** |
|                |                                                         |                                                         | 2. R37G11-GAL4> UAS- Shi <sup>ts1</sup> 32° |         |      |
|                |                                                         |                                                         | 1. R37G11-GAL4> UAS- Shi <sup>ts1</sup> 23° | >0.999  | N.S. |
|                |                                                         |                                                         | 2. R37G11-GAL4> UAS- Shi <sup>ts1</sup> 32° |         |      |
| Ethyl acetate  | One-way non parametric ANOVA -<br>Kruskal's-Wallis test |                                                         | 1. R37G11-GAL4                              | <0.0001 | **** |
|                |                                                         |                                                         | 2. UAS- Shi <sup>ts1</sup>                  |         |      |
|                |                                                         |                                                         | 3. R37G11-GAL4> UAS- Shi <sup>ts1</sup> 23° |         |      |
|                |                                                         |                                                         | 4. R37G11-GAL4> UAS- Shi <sup>ts1</sup> 32° |         |      |
|                |                                                         |                                                         | 1. R37G11-GAL4                              | 0.07    | N.S. |
|                |                                                         |                                                         | 2. UAS- Shi <sup>ts1</sup>                  |         |      |
|                |                                                         |                                                         | 1. R37G11-GAL4                              | 0.0019  | **   |
|                |                                                         |                                                         | 2. R37G11-GAL4> UAS- Shi <sup>ts1</sup> 23° |         |      |
|                | Dunn's multiple comparison test                         |                                                         | 1. UAS- Shi <sup>ts1</sup>                  | <0.0001 | **** |
|                |                                                         |                                                         | 2. R37G11-GAL4> UAS- Shi <sup>ts1</sup> 23° |         |      |
|                |                                                         |                                                         | 1. R37G11-GAL4                              | >0.999  | N.S. |
|                |                                                         |                                                         | 2. R37G11-GAL4> UAS- Shi <sup>ts1</sup> 32° |         |      |
|                |                                                         |                                                         | 1. UAS- Shi <sup>ts1</sup>                  | 0.06    | N.S. |
|                |                                                         |                                                         | 2. R37G11-GAL4> UAS- Shi <sup>ts1</sup> 32° |         |      |
|                |                                                         |                                                         | 1. R37G11-GAL4> UAS- Shi <sup>ts1</sup> 23° | 0.002   | **   |
|                |                                                         |                                                         | 2. R37G11-GAL4> UAS- Shi <sup>ts1</sup> 32° |         |      |
| Methyl acetate | One-way non parametric ANOVA -<br>Kruskal's-Wallis test |                                                         | 1. R37G11-GAL4                              | <0.0001 | **** |
|                |                                                         |                                                         | 2. UAS- Shi <sup>ts1</sup>                  |         |      |
|                |                                                         |                                                         | 3. R37G11-GAL4> UAS- Shi <sup>ts1</sup> 23° |         |      |
|                |                                                         |                                                         | 4. R37G11-GAL4> UAS- Shi <sup>ts1</sup> 32° |         |      |
|                |                                                         |                                                         | 1. R37G11-GAL4                              | 0.003   | **   |
|                |                                                         |                                                         | 2. UAS- Shi <sup>ts1</sup>                  |         |      |
|                |                                                         |                                                         | 1. R37G11-GAL4                              | <0.0001 | **** |
|                |                                                         |                                                         | 2. R37G11-GAL4> UAS- Shi <sup>ts1</sup> 23° |         |      |
|                | Dunn's multiple comparison test                         |                                                         | 1. UAS- Shi <sup>ts1</sup>                  | <0.0001 | **** |
|                |                                                         |                                                         | 2. R37G11-GAL4> UAS- Shi <sup>ts1</sup> 23° |         |      |
|                |                                                         |                                                         | 1. R37G11-GAL4                              | 0.009   | **   |
|                |                                                         |                                                         | 2. R37G11-GAL4> UAS- Shi <sup>ts1</sup> 32° |         |      |
|                |                                                         |                                                         | 1. UAS- Shi <sup>ts1</sup>                  | <0.0001 | **** |
|                |                                                         |                                                         | 2. R37G11-GAL4> UAS- Shi <sup>ts1</sup> 32° |         |      |
|                |                                                         |                                                         | 1. R37G11-GAL4> UAS- Shi <sup>ts1</sup> 23° | >0.999  | N.S. |
|                |                                                         |                                                         | 2. R37G11-GAL4> UAS- Shi <sup>ts1</sup> 32° |         |      |
| 6C             | Area Under the Curve                                    | One-way non parametric ANOVA -<br>Kruskal's-Wallis test | 1. Geranyl acetate                          | <0.0001 | **** |
|                |                                                         |                                                         | 2. ACV                                      |         |      |
|                |                                                         |                                                         | 3. Ethyl acetate                            |         |      |
|                |                                                         |                                                         | 4. 2-heptanone                              |         |      |
|                |                                                         |                                                         | 1. GA                                       | >0.999  | N.S. |
|                |                                                         |                                                         | 2. ACV                                      |         |      |
|                |                                                         |                                                         | 1. GA                                       | 0.008   | **   |
|                |                                                         |                                                         | 2. EA                                       |         |      |
|                |                                                         |                                                         | 1. GA                                       | 0.0006  | ***  |
|                |                                                         |                                                         | 2. 2-hep                                    |         |      |
|                | Dunn's multiple comparison test                         |                                                         | 1. ACV                                      | 0.009   | **   |
|                |                                                         |                                                         | 2. EA                                       |         |      |
|                |                                                         |                                                         | 1. ACV                                      | 0.0006  | ***  |
|                |                                                         |                                                         | 2. 2-hep                                    |         |      |
|                |                                                         |                                                         | 1. EA                                       | >0.999  | N.S. |
|                |                                                         |                                                         | 2. 2-hep                                    |         |      |
| 6D             | ACV                                                     | One-way non parametric ANOVA -                          | 1. R37G11-GAL4                              | 0.01    | *    |



|                 |                      |                                                         |                                                                                                                                            |         |      |
|-----------------|----------------------|---------------------------------------------------------|--------------------------------------------------------------------------------------------------------------------------------------------|---------|------|
|                 |                      | Kruskal's-Wallis test                                   | 2. UAS- Shi <sup>ts1</sup><br>3. R37G11-GAL4> UAS- Shi <sup>ts1</sup> 23°<br>4. R37G11-GAL4> UAS- Shi <sup>ts1</sup> 32°                   |         |      |
|                 |                      |                                                         | 1. R37G11-GAL4<br>2. UAS- Shi <sup>ts1</sup>                                                                                               | 0.44    | N.S. |
|                 |                      |                                                         | 1. R37G11-GAL4<br>2. R37G11-GAL4> UAS- Shi <sup>ts1</sup> 23°                                                                              | >0.999  | N.S. |
|                 |                      | Dunn's multiple comparison test                         | 1. UAS- Shi <sup>ts1</sup><br>2. R37G11-GAL4> UAS- Shi <sup>ts1</sup> 23°                                                                  | 0.17    | N.S. |
|                 |                      |                                                         | 1. R37G11-GAL4<br>2. R37G11-GAL4> UAS- Shi <sup>ts1</sup> 32°                                                                              | >0.999  | N.S. |
|                 |                      |                                                         | 1. UAS- Shi <sup>ts1</sup><br>2. R37G11-GAL4> UAS- Shi <sup>ts1</sup> 32°                                                                  | 0.01    | *    |
|                 |                      |                                                         | 1. R37G11-GAL4> UAS- Shi <sup>ts1</sup> 23°<br>2. R37G11-GAL4> UAS- Shi <sup>ts1</sup> 32°                                                 | >0.999  | N.S. |
| Geranyl acetate |                      | One-way non parametric ANOVA -<br>Kruskal's-Wallis test | 1. R37G11-GAL4<br>2. UAS- Shi <sup>ts1</sup><br>3. R37G11-GAL4> UAS- Shi <sup>ts1</sup> 23°<br>4. R37G11-GAL4> UAS- Shi <sup>ts1</sup> 32° | 0.12    | N.S. |
| 2-butanone      |                      | One-way non parametric ANOVA -<br>Kruskal's-Wallis test | 1. R37G11-GAL4<br>2. UAS- Shi <sup>ts1</sup><br>3. R37G11-GAL4> UAS- Shi <sup>ts1</sup> 23°<br>4. R37G11-GAL4> UAS- Shi <sup>ts1</sup> 32° | 0.19    | N.S. |
| 2-heptanone     |                      | One-way non parametric ANOVA -<br>Kruskal's-Wallis test | 1. R37G11-GAL4<br>2. UAS- Shi <sup>ts1</sup><br>3. R37G11-GAL4> UAS- Shi <sup>ts1</sup> 23°<br>4. R37G11-GAL4> UAS- Shi <sup>ts1</sup> 32° | 0.11    | N.S. |
| Hexyl acetate   |                      | One-way non parametric ANOVA -<br>Kruskal's-Wallis test | 1. R37G11-GAL4<br>2. UAS- Shi <sup>ts1</sup><br>3. R37G11-GAL4> UAS- Shi <sup>ts1</sup> 23°<br>4. R37G11-GAL4> UAS- Shi <sup>ts1</sup> 32° | 0.84    | N.S. |
| Ethyl acetate   |                      | One-way non parametric ANOVA -<br>Kruskal's-Wallis test | 1. R37G11-GAL4<br>2. UAS- Shi <sup>ts1</sup><br>3. R37G11-GAL4> UAS- Shi <sup>ts1</sup> 23°<br>4. R37G11-GAL4> UAS- Shi <sup>ts1</sup> 32° | 0.1     | N.S. |
| Methyl acetate  |                      | One-way non parametric ANOVA -<br>Kruskal's-Wallis test | 1. R37G11-GAL4<br>2. UAS- Shi <sup>ts1</sup><br>3. R37G11-GAL4> UAS- Shi <sup>ts1</sup> 23°<br>4. R37G11-GAL4> UAS- Shi <sup>ts1</sup> 32° | 0.81    | N.S. |
| 6E              | 2-butanone<br>40 sec | One-way non parametric ANOVA -<br>Kruskal's-Wallis test | 1. R37G11-GAL4<br>2. UAS- Shi <sup>ts1</sup><br>3. R37G11-GAL4> UAS- Shi <sup>ts1</sup> 23°<br>4. R37G11-GAL4> UAS- Shi <sup>ts1</sup> 32° | <0.0001 | N.S. |
|                 |                      |                                                         | 1. R37G11-GAL4<br>2. UAS- Shi <sup>ts1</sup>                                                                                               | 0.055   | N.S. |
|                 |                      |                                                         | 1. R37G11-GAL4<br>2. R37G11-GAL4> UAS- Shi <sup>ts1</sup> 23°                                                                              | 0.41    | N.S. |
|                 |                      | Dunn's multiple comparison test                         | 1. UAS-Shi <sup>ts1</sup><br>2. R37G11-GAL4> UAS-Shi <sup>ts1</sup> 23°                                                                    | 0.0003  | ***  |
|                 |                      |                                                         | 1. R37G11-GAL4<br>2. R37G11-GAL4> UAS- Shi <sup>ts1</sup> 32°                                                                              | <0.0001 | **** |
|                 |                      |                                                         | 1. UAS- Shi <sup>ts1</sup><br>2. R37G11-GAL4> UAS- Shi <sup>ts1</sup> 32°                                                                  | <0.0001 | **** |
|                 |                      |                                                         | 1. R37G11-GAL4> UAS- Shi <sup>ts1</sup> 23°<br>2. R37G11-GAL4> UAS- Shi <sup>ts1</sup> 32°                                                 | 0.22    | N.S. |

|                                 |                                                         |                                          |                                          |         |      |
|---------------------------------|---------------------------------------------------------|------------------------------------------|------------------------------------------|---------|------|
| 2-butanone<br>80 sec            | One-way non parametric ANOVA -<br>Kruskal's-Wallis test | 1.                                       | R37G11-GAL4                              | <0.0001 | **** |
|                                 |                                                         | 2.                                       | UAS- Shi <sup>ts1</sup>                  |         |      |
|                                 |                                                         | 3.                                       | R37G11-GAL4> UAS- Shi <sup>ts1</sup> 23° |         |      |
|                                 |                                                         | 4.                                       | R37G11-GAL4> UAS- Shi <sup>ts1</sup> 32° |         |      |
|                                 | Dunn's multiple comparison test                         | 1.                                       | R37G11-GAL4                              | >0.999  | N.S. |
|                                 |                                                         | 2.                                       | UAS- Shi <sup>ts1</sup>                  |         |      |
|                                 |                                                         | 1.                                       | R37G11-GAL4                              | >0.999  | N.S. |
|                                 |                                                         | 2.                                       | R37G11-GAL4> UAS- Shi <sup>ts1</sup> 23° |         |      |
|                                 |                                                         | 1.                                       | UAS- Shi <sup>ts1</sup>                  | 0.477   | N.S. |
|                                 |                                                         | 2.                                       | R37G11-GAL4> UAS- Shi <sup>ts1</sup> 23° |         |      |
| Dunn's multiple comparison test | 1.                                                      | R37G11-GAL4                              | <0.0001                                  | ****    |      |
|                                 | 2.                                                      | R37G11-GAL4> UAS- Shi <sup>ts1</sup> 32° |                                          |         |      |
|                                 | 1.                                                      | UAS- Shi <sup>ts1</sup>                  | <0.0001                                  | ****    |      |
|                                 | 2.                                                      | R37G11-GAL4> UAS- Shi <sup>ts1</sup> 32° |                                          |         |      |
|                                 | 1.                                                      | R37G11-GAL4> UAS- Shi <sup>ts1</sup> 23° | 0.003                                    | **      |      |
|                                 | 2.                                                      | R37G11-GAL4> UAS- Shi <sup>ts1</sup> 32° |                                          |         |      |

|                                 |                                                         |                                          |                                          |        |      |
|---------------------------------|---------------------------------------------------------|------------------------------------------|------------------------------------------|--------|------|
| Methyl<br>acetate<br>40 sec     | One-way non parametric ANOVA -<br>Kruskal's-Wallis test | 1.                                       | R37G11-GAL4                              | 0.01   | *    |
|                                 |                                                         | 2.                                       | UAS- Shi <sup>ts1</sup>                  |        |      |
|                                 |                                                         | 3.                                       | R37G11-GAL4> UAS- Shi <sup>ts1</sup> 23° |        |      |
|                                 |                                                         | 4.                                       | R37G11-GAL4> UAS- Shi <sup>ts1</sup> 32° |        |      |
|                                 | Dunn's multiple comparison test                         | 1.                                       | R37G11-GAL4                              | 0.12   | N.S. |
|                                 |                                                         | 2.                                       | UAS- Shi <sup>ts1</sup>                  |        |      |
|                                 |                                                         | 1.                                       | R37G11-GAL4                              | 0.08   | N.S. |
|                                 |                                                         | 2.                                       | R37G11-GAL4> UAS- Shi <sup>ts1</sup> 23° |        |      |
|                                 |                                                         | 1.                                       | UAS- Shi <sup>ts1</sup>                  | >0.999 | N.S. |
|                                 |                                                         | 2.                                       | R37G11-GAL4> UAS- Shi <sup>ts1</sup> 23° |        |      |
| Dunn's multiple comparison test | 1.                                                      | R37G11-GAL4                              | >0.999                                   | N.S.   |      |
|                                 | 2.                                                      | R37G11-GAL4> UAS- Shi <sup>ts1</sup> 32° |                                          |        |      |
|                                 | 1.                                                      | UAS- Shi <sup>ts1</sup>                  | 0.31                                     | N.S.   |      |
|                                 | 2.                                                      | R37G11-GAL4> UAS- Shi <sup>ts1</sup> 32° |                                          |        |      |
|                                 | 1.                                                      | R37G11-GAL4> UAS- Shi <sup>ts1</sup> 23° | 0.16                                     | N.S.   |      |
|                                 | 2.                                                      | R37G11-GAL4> UAS- Shi <sup>ts1</sup> 32° |                                          |        |      |

|                                 |                                                         |                                          |                                          |         |      |
|---------------------------------|---------------------------------------------------------|------------------------------------------|------------------------------------------|---------|------|
| Methyl<br>acetate<br>80 sec     | One-way non parametric ANOVA -<br>Kruskal's-Wallis test | 1.                                       | R37G11-GAL4                              | <0.0001 | **** |
|                                 |                                                         | 2.                                       | UAS- Shi <sup>ts1</sup>                  |         |      |
|                                 |                                                         | 3.                                       | R37G11-GAL4> UAS- Shi <sup>ts1</sup> 23° |         |      |
|                                 |                                                         | 4.                                       | R37G11-GAL4> UAS- Shi <sup>ts1</sup> 32° |         |      |
|                                 | Dunn's multiple comparison test                         | 1.                                       | R37G11-GAL4                              | <0.0001 | **** |
|                                 |                                                         | 2.                                       | UAS- Shi <sup>ts1</sup>                  |         |      |
|                                 |                                                         | 1.                                       | R37G11-GAL4                              | 0.0002  | ***  |
|                                 |                                                         | 2.                                       | R37G11-GAL4> UAS- Shi <sup>ts1</sup> 23° |         |      |
|                                 |                                                         | 1.                                       | UAS- Shi <sup>ts1</sup>                  | >0.999  | N.S. |
|                                 |                                                         | 2.                                       | R37G11-GAL4> UAS- Shi <sup>ts1</sup> 23° |         |      |
| Dunn's multiple comparison test | 1.                                                      | R37G11-GAL4                              | >0.999                                   | N.S.    |      |
|                                 | 2.                                                      | R37G11-GAL4> UAS- Shi <sup>ts1</sup> 32° |                                          |         |      |
|                                 | 1.                                                      | UAS- Shi <sup>ts1</sup>                  | <0.0001                                  | ****    |      |
|                                 | 2.                                                      | R37G11-GAL4> UAS- Shi <sup>ts1</sup> 32° |                                          |         |      |
|                                 | 1.                                                      | R37G11-GAL4> UAS- Shi <sup>ts1</sup> 23° | 0.0004                                   | ***     |      |
|                                 | 2.                                                      | R37G11-GAL4> UAS- Shi <sup>ts1</sup> 32° |                                          |         |      |

|                         |                                                         |        |                                          |         |      |
|-------------------------|---------------------------------------------------------|--------|------------------------------------------|---------|------|
| Ethyl acetate<br>40 sec | One-way non parametric ANOVA -<br>Kruskal's-Wallis test | 1.     | R37G11-GAL4                              | <0.0001 | **** |
|                         |                                                         | 2.     | UAS- Shi <sup>ts1</sup>                  |         |      |
|                         |                                                         | 3.     | R37G11-GAL4> UAS- Shi <sup>ts1</sup> 23° |         |      |
|                         |                                                         | 4.     | R37G11-GAL4> UAS- Shi <sup>ts1</sup> 32° |         |      |
|                         | Dunn's multiple comparison test                         | 1.     | R37G11-GAL4                              | 0.03    | *    |
|                         |                                                         | 2.     | UAS- Shi <sup>ts1</sup>                  |         |      |
|                         |                                                         | 1.     | R37G11-GAL4                              | 0.0002  | ***  |
|                         |                                                         | 2.     | R37G11-GAL4> UAS- Shi <sup>ts1</sup> 23° |         |      |
|                         |                                                         | 1.     | UAS- Shi <sup>ts1</sup>                  | 0.94    | N.S. |
| 2.                      | R37G11-GAL4> UAS- Shi <sup>ts1</sup> 23°                |        |                                          |         |      |
| 3.                      | R37G11-GAL4                                             | >0.999 | N.S.                                     |         |      |

|                         |                                                         |    |                                          |         |      |
|-------------------------|---------------------------------------------------------|----|------------------------------------------|---------|------|
|                         |                                                         | 4. | R37G11-GAL4> UAS- Shi <sup>ts1</sup> 32° |         |      |
|                         |                                                         | 1. | UAS- Shi <sup>ts1</sup>                  | 0.03    | *    |
|                         |                                                         | 2. | R37G11-GAL4> UAS- Shi <sup>ts1</sup> 32° |         |      |
|                         |                                                         | 1. | R37G11-GAL4> UAS- Shi <sup>ts1</sup> 23° | 0.0002  | ***  |
|                         |                                                         | 2. | R37G11-GAL4> UAS- Shi <sup>ts1</sup> 32° |         |      |
| Ethyl acetate<br>80 sec | One-way non parametric ANOVA -<br>Kruskal's-Wallis test | 1. | R37G11-GAL4                              | <0.0001 | **** |
|                         |                                                         | 2. | UAS- Shi <sup>ts1</sup>                  |         |      |
|                         |                                                         | 3. | R37G11-GAL4> UAS- Shi <sup>ts1</sup> 23° |         |      |
|                         |                                                         | 4. | R37G11-GAL4> UAS- Shi <sup>ts1</sup> 32° |         |      |
|                         | Dunn's multiple comparison test                         | 1. | R37G11-GAL4                              | <0.0001 | **** |
|                         |                                                         | 2. | UAS- Shi <sup>ts1</sup>                  |         |      |
|                         |                                                         | 1. | R37G11-GAL4                              | <0.0001 | **** |
|                         |                                                         | 2. | R37G11-GAL4> UAS- Shi <sup>ts1</sup> 23° |         |      |
|                         |                                                         | 1. | UAS- Shi <sup>ts1</sup>                  | >0.999  | N.S. |
|                         |                                                         | 2. | R37G11-GAL4> UAS- Shi <sup>ts1</sup> 23° |         |      |
|                         |                                                         | 1. | R37G11-GAL4                              | >0.999  | N.S. |
|                         |                                                         | 2. | R37G11-GAL4> UAS- Shi <sup>ts1</sup> 32° |         |      |
|                         |                                                         | 1. | UAS- Shi <sup>ts1</sup>                  | 0.0002  | ***  |
|                         |                                                         | 2. | R37G11-GAL4> UAS- Shi <sup>ts1</sup> 32° |         |      |
|                         |                                                         | 1. | R37G11-GAL4> UAS- Shi <sup>ts1</sup> 23° | <0.0001 | **** |
|                         |                                                         | 2. | R37G11-GAL4> UAS- Shi <sup>ts1</sup> 32° |         |      |
| 2-heptanone<br>40 sec   | One-way non parametric ANOVA -<br>Kruskal's-Wallis test | 1. | R37G11-GAL4                              | <0.0001 | **** |
|                         |                                                         | 2. | UAS- Shi <sup>ts1</sup>                  |         |      |
|                         |                                                         | 3. | R37G11-GAL4> UAS- Shi <sup>ts1</sup> 23° |         |      |
|                         |                                                         | 4. | R37G11-GAL4> UAS- Shi <sup>ts1</sup> 32° |         |      |
|                         | Dunn's multiple comparison test                         | 1. | R37G11-GAL4                              | 0.01    | *    |
|                         |                                                         | 2. | UAS- Shi <sup>ts1</sup>                  |         |      |
|                         |                                                         | 1. | R37G11-GAL4                              | 0.13    | N.S. |
|                         |                                                         | 2. | R37G11-GAL4> UAS- Shi <sup>ts1</sup> 23° |         |      |
|                         |                                                         | 1. | UAS- Shi <sup>ts1</sup>                  | >0.999  | N.S. |
|                         |                                                         | 2. | R37G11-GAL4> UAS- Shi <sup>ts1</sup> 23° |         |      |
|                         |                                                         | 1. | R37G11-GAL4                              | 0.62    | N.S. |
|                         |                                                         | 2. | R37G11-GAL4> UAS- Shi <sup>ts1</sup> 32° |         |      |
|                         |                                                         | 1. | UAS- Shi <sup>ts1</sup>                  | <0.001  | **** |
|                         |                                                         | 2. | R37G11-GAL4> UAS- Shi <sup>ts1</sup> 32° |         |      |
|                         |                                                         | 1. | R37G11-GAL4> UAS- Shi <sup>ts1</sup> 23° | 0.001   | **   |
|                         |                                                         | 2. | R37G11-GAL4> UAS- Shi <sup>ts1</sup> 32° |         |      |
| 2-heptanone<br>80 sec   | One-way non parametric ANOVA -<br>Kruskal's-Wallis test | 1. | R37G11-GAL4                              | 0.0003  | ***  |
|                         |                                                         | 2. | UAS- Shi <sup>ts1</sup>                  |         |      |
|                         |                                                         | 3. | R37G11-GAL4> UAS- Shi <sup>ts1</sup> 23° |         |      |
|                         |                                                         | 4. | R37G11-GAL4> UAS- Shi <sup>ts1</sup> 32° |         |      |
|                         | Dunn's multiple comparison test                         | 1. | R37G11-GAL4                              | 0.002   | **   |
|                         |                                                         | 2. | UAS- Shi <sup>ts1</sup>                  |         |      |
|                         |                                                         | 1. | R37G11-GAL4                              | 0.88    | N.S. |
|                         |                                                         | 2. | R37G11-GAL4> UAS- Shi <sup>ts1</sup> 23° |         |      |
|                         |                                                         | 1. | UAS- Shi <sup>ts1</sup>                  | 0.55    | N.S. |
|                         |                                                         | 2. | R37G11-GAL4> UAS- Shi <sup>ts1</sup> 23° |         |      |
|                         |                                                         | 1. | R37G11-GAL4                              | >0.999  | N.S. |
|                         |                                                         | 2. | R37G11-GAL4> UAS- Shi <sup>ts1</sup> 32° |         |      |
|                         |                                                         | 1. | UAS- Shi <sup>ts1</sup>                  | 0.0007  | ***  |
|                         |                                                         | 2. | R37G11-GAL4> UAS- Shi <sup>ts1</sup> 32° |         |      |
|                         |                                                         | 1. | R37G11-GAL4> UAS- Shi <sup>ts1</sup> 23° | 0.34    | N.S. |
|                         |                                                         | 2. | R37G11-GAL4> UAS- Shi <sup>ts1</sup> 32° |         |      |
| Hexyl acetate<br>40 sec | One-way non parametric ANOVA -<br>Kruskal's-Wallis test | 1. | R37G11-GAL4                              | 0.02    | *    |
|                         |                                                         | 2. | UAS- Shi <sup>ts1</sup>                  |         |      |
|                         |                                                         | 3. | R37G11-GAL4> UAS- Shi <sup>ts1</sup> 23° |         |      |
|                         |                                                         | 4. | R37G11-GAL4> UAS- Shi <sup>ts1</sup> 32° |         |      |

|                              |                                                         |                                                                                                                                            |         |      |
|------------------------------|---------------------------------------------------------|--------------------------------------------------------------------------------------------------------------------------------------------|---------|------|
|                              | Dunn's multiple comparison test                         | 1. R37G11-GAL4<br>2. UAS- Shi <sup>ts1</sup>                                                                                               | 0.54    | N.S. |
|                              |                                                         | 1. R37G11-GAL4<br>2. R37G11-GAL4> UAS- Shi <sup>ts1</sup> 23°                                                                              | >0.999  | N.S. |
|                              |                                                         | 1. UAS- Shi <sup>ts1</sup><br>2. R37G11-GAL4> UAS- Shi <sup>ts1</sup> 23°                                                                  | 0.9     | N.S. |
|                              |                                                         | 1. R37G11-GAL4<br>2. R37G11-GAL4> UAS- Shi <sup>ts1</sup> 32°                                                                              | 0.06    | N.S. |
|                              |                                                         | 1. UAS- Shi <sup>ts1</sup><br>2. R37G11-GAL4> UAS- Shi <sup>ts1</sup> 32°                                                                  | >0.999  | N.S. |
|                              |                                                         | 1. R37G11-GAL4> UAS- Shi <sup>ts1</sup> 23°<br>2. R37G11-GAL4> UAS- Shi <sup>ts1</sup> 32°                                                 | 0.09    | N.S. |
| Hexyl acetate<br>80 sec      | One-way non parametric ANOVA -<br>Kruskal's-Wallis test | 1. R37G11-GAL4<br>2. UAS- Shi <sup>ts1</sup><br>3. R37G11-GAL4> UAS- Shi <sup>ts1</sup> 23°<br>4. R37G11-GAL4> UAS- Shi <sup>ts1</sup> 32° | 0.0001  | ***  |
|                              |                                                         | 1. R37G11-GAL4<br>2. UAS- Shi <sup>ts1</sup>                                                                                               | 0.66    | N.S. |
|                              |                                                         | 1. R37G11-GAL4<br>2. R37G11-GAL4> UAS- Shi <sup>ts1</sup> 23°                                                                              | >0.999  | N.S. |
|                              | Dunn's multiple comparison test                         | 1. UAS- Shi <sup>ts1</sup><br>2. R37G11-GAL4> UAS- Shi <sup>ts1</sup> 23°                                                                  | >0.999  | N.S. |
|                              |                                                         | 1. R37G11-GAL4<br>2. R37G11-GAL4> UAS- Shi <sup>ts1</sup> 32°                                                                              | 0.0006  | ***  |
|                              |                                                         | 1. UAS- Shi <sup>ts1</sup><br>2. R37G11-GAL4> UAS- Shi <sup>ts1</sup> 32°                                                                  | 0.03    | *    |
|                              |                                                         | 1. R37G11-GAL4> UAS- Shi <sup>ts1</sup> 23°<br>2. R37G11-GAL4> UAS- Shi <sup>ts1</sup> 32°                                                 | 0.0009  | ***  |
| Geranyl<br>acetate<br>40 sec | One-way non parametric ANOVA -<br>Kruskal's-Wallis test | 1. R37G11-GAL4<br>2. UAS- Shi <sup>ts1</sup><br>3. R37G11-GAL4> UAS- Shi <sup>ts1</sup> 23°<br>4. R37G11-GAL4> UAS- Shi <sup>ts1</sup> 32° | 0.0001  | ***  |
|                              |                                                         | 1. R37G11-GAL4<br>2. UAS- Shi <sup>ts1</sup>                                                                                               | >0.999  | N.S. |
|                              |                                                         | 1. R37G11-GAL4<br>2. R37G11-GAL4> UAS- Shi <sup>ts1</sup> 23°                                                                              | 0.1     | N.S. |
|                              | Dunn's multiple comparison test                         | 1. UAS- Shi <sup>ts1</sup><br>2. R37G11-GAL4> UAS- Shi <sup>ts1</sup> 23°                                                                  | 0.29    | N.S. |
|                              |                                                         | 1. R37G11-GAL4<br>2. R37G11-GAL4> UAS- Shi <sup>ts1</sup> 32°                                                                              | 0.006   | ***  |
|                              |                                                         | 1. UAS- Shi <sup>ts1</sup><br>2. R37G11-GAL4> UAS- Shi <sup>ts1</sup> 32°                                                                  | 0.003   | **   |
|                              |                                                         | 1. R37G11-GAL4> UAS- Shi <sup>ts1</sup> 23°<br>2. R37G11-GAL4> UAS- Shi <sup>ts1</sup> 32°                                                 | >0.999  | N.S. |
| Geranyl<br>acetate<br>80 sec | One-way non parametric ANOVA -<br>Kruskal's-Wallis test | 1. R37G11-GAL4<br>2. UAS- Shi <sup>ts1</sup><br>3. R37G11-GAL4> UAS- Shi <sup>ts1</sup> 23°<br>4. R37G11-GAL4> UAS- Shi <sup>ts1</sup> 32° | <0.0001 | **** |
|                              |                                                         | 1. R37G11-GAL4<br>2. UAS- Shi <sup>ts1</sup>                                                                                               | >0.999  | N.S. |
|                              |                                                         | 1. R37G11-GAL4<br>2. R37G11-GAL4> UAS- Shi <sup>ts1</sup> 23°                                                                              | 0.24    | N.S. |
|                              | Dunn's multiple comparison test                         | 1. UAS- Shi <sup>ts1</sup><br>2. R37G11-GAL4> UAS- Shi <sup>ts1</sup> 23°                                                                  | 0.23    | N.S. |
|                              |                                                         | 1. R37G11-GAL4<br>2. R37G11-GAL4> UAS- Shi <sup>ts1</sup> 32°                                                                              | <0.001  | **** |
|                              |                                                         | 1. UAS- Shi <sup>ts1</sup><br>2. R37G11-GAL4> UAS- Shi <sup>ts1</sup> 32°                                                                  | <0.0001 | **** |

|            |                                                         |                                           |                                             |         |      |
|------------|---------------------------------------------------------|-------------------------------------------|---------------------------------------------|---------|------|
|            |                                                         |                                           | 1. R37G11-GAL4> UAS- Shi <sup>ts1</sup> 23° | 0.04    | *    |
|            |                                                         |                                           | 2. R37G11-GAL4> UAS- Shi <sup>ts1</sup> 32° |         |      |
| ACV 40 sec | One-way non parametric ANOVA -<br>Kruskal's-Wallis test |                                           | 1. R37G11-GAL4                              | 0.0008  | ***  |
|            |                                                         |                                           | 2. UAS- Shi <sup>ts1</sup>                  |         |      |
|            |                                                         |                                           | 3. R37G11-GAL4> UAS- Shi <sup>ts1</sup> 23° |         |      |
|            |                                                         |                                           | 4. R37G11-GAL4> UAS- Shi <sup>ts1</sup> 32° |         |      |
|            |                                                         |                                           | 1. R37G11-GAL4                              | >0.999  | N.S. |
|            |                                                         |                                           | 2. UAS- Shi <sup>ts1</sup>                  |         |      |
|            |                                                         |                                           | 1. R37G11-GAL4                              | >0.999  | N.S. |
|            |                                                         |                                           | 2. R37G11-GAL4> UAS- Shi <sup>ts1</sup> 23° |         |      |
|            | Dunn's multiple comparison test                         |                                           | 1. UAS- Shi <sup>ts1</sup>                  | 0.59    | N.S. |
|            |                                                         |                                           | 2. R37G11-GAL4> UAS- Shi <sup>ts1</sup> 23° |         |      |
|            |                                                         |                                           | 1. R37G11-GAL4                              | 0.006   | **   |
|            |                                                         |                                           | 2. R37G11-GAL4> UAS- Shi <sup>ts1</sup> 32° |         |      |
|            |                                                         |                                           | 1. UAS- Shi <sup>ts1</sup>                  | >0.999  | N.S. |
|            |                                                         |                                           | 2. R37G11-GAL4> UAS- Shi <sup>ts1</sup> 32° |         |      |
|            |                                                         |                                           | 1. R37G11-GAL4> UAS- Shi <sup>ts1</sup> 23° | 0.002   | **   |
|            |                                                         |                                           | 2. R37G11-GAL4> UAS- Shi <sup>ts1</sup> 32° |         |      |
| ACV 80 sec | One-way non parametric ANOVA -<br>Kruskal's-Wallis test |                                           | 1. R37G11-GAL4                              | <0.0001 | **** |
|            |                                                         |                                           | 2. UAS- Shi <sup>ts1</sup>                  |         |      |
|            |                                                         |                                           | 3. R37G11-GAL4> UAS- Shi <sup>ts1</sup> 23° |         |      |
|            |                                                         |                                           | 4. R37G11-GAL4> UAS- Shi <sup>ts1</sup> 32° |         |      |
|            |                                                         |                                           | 1. R37G11-GAL4                              | >0.999  | N.S. |
|            |                                                         |                                           | 2. UAS- Shi <sup>ts1</sup>                  |         |      |
|            |                                                         |                                           | 1. R37G11-GAL4                              | 0.08    | N.S. |
|            |                                                         |                                           | 2. R37G11-GAL4> UAS- Shi <sup>ts1</sup> 23° |         |      |
|            |                                                         |                                           | 1. UAS- Shi <sup>ts1</sup>                  | 0.09    | N.S. |
|            |                                                         |                                           | 2. R37G11-GAL4> UAS- Shi <sup>ts1</sup> 23° |         |      |
|            | Dunn's multiple comparison test                         |                                           | 1. R37G11-GAL4                              | 0.07    | N.S. |
|            |                                                         |                                           | 2. R37G11-GAL4> UAS- Shi <sup>ts1</sup> 32° |         |      |
|            |                                                         |                                           | 1. UAS- Shi <sup>ts1</sup>                  | 0.65    | N.S. |
|            |                                                         |                                           | 2. R37G11-GAL4> UAS- Shi <sup>ts1</sup> 32° |         |      |
|            |                                                         |                                           | 1. R37G11-GAL4> UAS- Shi <sup>ts1</sup> 23° | <0.0001 | **** |
|            |                                                         |                                           | 2. R37G11-GAL4> UAS- Shi <sup>ts1</sup> 32° |         |      |
| S2E        | ∫ΔF/F dt                                                | Pearson correlation                       | 1. R37G11-GAL4                              | <0.0001 | **** |
|            |                                                         |                                           | 2. R48F03-GAL4                              |         |      |
| S2F        | Time to peak<br>(s)                                     | Pearson correlation                       | 1. R37G11-GAL4                              | <0.0001 | **** |
|            |                                                         |                                           | 2. R48F03-GAL4                              |         |      |
| S2G        | R37G11                                                  | Spearman correlation (non-<br>parametric) | 1. Peak                                     | <0.0001 | **** |
|            |                                                         |                                           | 2. Percent responding cells                 |         |      |
|            |                                                         |                                           | 1. Peak                                     | <0.0001 | **** |
|            |                                                         |                                           | 2. Area under curve                         |         |      |
|            |                                                         |                                           | 1. Peak                                     | 0.076   | N.S. |
|            |                                                         |                                           | 2. Time to peak                             |         |      |
|            |                                                         |                                           | 1. Peak                                     | 0.004   | **   |
|            |                                                         |                                           | 2. Response persistence                     |         |      |
|            |                                                         |                                           | 1. Percent responding cells                 | <0.0001 | **** |
|            |                                                         |                                           | 2. Area under curve                         |         |      |
|            |                                                         |                                           | 1. Percent responding cells                 | 0.156   | N.S. |
|            |                                                         |                                           | 2. Time to peak                             |         |      |
|            |                                                         |                                           | 1. Percent responding cells                 | 0.013   | *    |
|            |                                                         |                                           | 2. Response persistence                     |         |      |
|            |                                                         |                                           | 1. Area under curve                         | 0.0131  | *    |
|            |                                                         |                                           | 2. Time to peak                             |         |      |
|            |                                                         |                                           | 1. Area under curve                         | 0.001   | **   |
|            |                                                         |                                           | 2. Response persistence                     |         |      |

|     |                             |                                       |                                              |         |      |
|-----|-----------------------------|---------------------------------------|----------------------------------------------|---------|------|
|     |                             |                                       | 1. Time to peak                              | 0.0002  | ***  |
|     |                             |                                       | 2. Response persistence                      |         |      |
| S2H | R48F03                      | Spearman correlation (non-parametric) | 3. Peak                                      | <0.0001 | **** |
|     |                             |                                       | 4. Percent responding cells                  |         |      |
|     |                             |                                       | 3. Peak                                      | <0.0001 | **** |
|     |                             |                                       | 4. Area under curve                          |         |      |
|     |                             |                                       | 3. Peak                                      | 0.0391  | *    |
|     |                             |                                       | 4. Time to peak                              |         |      |
|     |                             |                                       | 3. Peak                                      | 0.0391  | *    |
|     |                             |                                       | 4. Response persistence                      |         |      |
|     |                             |                                       | 3. Percent responding cells                  | 0.0014  | *    |
|     |                             |                                       | 4. Area under curve                          |         |      |
|     |                             |                                       | 3. Percent responding cells                  | 0.137   | N.S. |
|     |                             |                                       | 4. Time to peak                              |         |      |
|     |                             |                                       | 3. Percent responding cells                  | 0.116   | N.S. |
|     |                             |                                       | 4. Response persistence                      |         |      |
|     |                             |                                       | 3. Area under curve                          | 0.002   | *    |
|     |                             |                                       | 4. Time to peak                              |         |      |
|     |                             |                                       | 3. Area under curve                          | 0.002   | ±    |
|     |                             |                                       | 4. Response persistence                      |         |      |
|     |                             |                                       | 3. Time to peak                              | <0.0001 | **** |
|     |                             |                                       | 4. Response persistence                      |         |      |
| S3B | Peak Response $\Delta F/F$  | Two-Way ordinary ANOVA                | Interaction                                  | 0.002   | **   |
|     |                             |                                       | Main effect of odor                          | <0.0001 | **** |
|     |                             |                                       | Main effect of compartment (somata Vs axons) | 0.0006  | ***  |
|     |                             |                                       | ACV somata Vs axons                          | 0.0002  | ***  |
|     |                             |                                       | Ethyl acetate somata Vs axons                | 0.366   | N.S. |
|     |                             | Sidak's multiple comparison test      | Ethyl lactate somata Vs axons                | 0.999   | N.S. |
|     |                             |                                       | Geranyl acetate somata Vs axons              | 0.199   | N.S. |
|     |                             |                                       | 2-butanone somata Vs axons                   | >0.999  | N.S. |
|     |                             |                                       | MCH somata Vs axons                          | 0.999   | N.S. |
|     |                             |                                       | Hexyl acetate somata Vs axons                | 0.958   | N.S. |
|     |                             |                                       | 2-heptanone somata Vs axons                  | 0.996   | N.S. |
| S3C | Peak responses $\Delta F/F$ | Pearson correlation                   | Somata Vs Axons                              | 0.0158  | *    |
| S3D | Time to peak (s)            | Two-Way ordinary ANOVA                | Interaction                                  | 0.04    | *    |
|     |                             |                                       | Main effect of odor                          | <0.0001 | **** |
|     |                             |                                       | Main effect of compartment (somata Vs axons) | <0.0001 | **** |
|     |                             |                                       | ACV somata Vs axons                          | 0.805   | N.S. |
|     |                             | Sidak's multiple comparison test      | Ethyl acetate somata Vs axons                | 0.367   | N.S. |
|     |                             |                                       | Ethyl lactate somata Vs axons                | <0.0001 | **** |

|     |                       |                                                      |                                              |          |      |
|-----|-----------------------|------------------------------------------------------|----------------------------------------------|----------|------|
|     |                       |                                                      | Geranyl acetate somata Vs axons              | 0.691    | N.S. |
|     |                       |                                                      | 2-butanone somata Vs axons                   | <0.0001  | N.S. |
|     |                       |                                                      | MCH somata Vs axons                          | 0.934    | N.S. |
|     |                       |                                                      | Hexyl acetate somata Vs axons                | 0.478    | N.S. |
|     |                       |                                                      | 2-heptanone somata Vs axons                  | 0.656    | N.S. |
| S3E | Time to peak (s)      | Pearson correlation                                  | Somata Vs Axons                              | 0.008    | **   |
| S3F | Responses persistence | Two-Way ordinary ANOVA                               | Interaction                                  | 0.082    | N.S. |
|     |                       |                                                      | Main effect of odor                          | <0.0001  | **** |
|     |                       |                                                      | Main effect of compartment (somata Vs axons) | <0.0001  | **** |
|     |                       |                                                      | ACV somata Vs axons                          | 0.995    | N.S. |
|     |                       |                                                      | Ethyl acetate somata Vs axons                | 0.991    | N.S. |
|     |                       |                                                      | Ethyl lactate somata Vs axons                | <0.0001  | **** |
|     |                       | Sidak's multiple comparison test                     | Geranyl acetate somata Vs axons              | 0.009    | **   |
|     |                       |                                                      | 2-butanone somata Vs axons                   | 0.985    | N.S. |
|     |                       |                                                      | MCH somata Vs axons                          | 0.998    | N.S. |
|     |                       |                                                      | Hexyl acetate somata Vs axons                | 0.009    | **   |
|     |                       |                                                      | 2-heptanone somata Vs axons                  | 0.768    | N.S. |
| S3G | Responses persistence | Pearson correlation                                  | Somata Vs Axons                              | 0.026    | *    |
| S4A | Walking speed         | One-way non parametric ANOVA - Kruskal's-Wallis test | 1. R37G11-GAL4                               | 0.0185   | *    |
|     |                       |                                                      | 2. UAS- Shi <sup>ts1</sup>                   |          |      |
|     |                       |                                                      | 3. R37G11-GAL4> UAS- Shi <sup>ts1</sup> 23°  |          |      |
|     |                       |                                                      | 4. R37G11-GAL4> UAS- Shi <sup>ts1</sup> 32°  |          |      |
|     |                       |                                                      | 1. R37G11-GAL4                               | > 0.9999 | N.S. |
|     |                       |                                                      | 2. UAS- Shi <sup>ts1</sup>                   |          |      |
|     |                       |                                                      | 1. R37G11-GAL4                               | 0.4444   | N.S. |
|     |                       |                                                      | 2. R37G11-GAL4> UAS- Shi <sup>ts1</sup> 32°  |          |      |
|     |                       | Dunn's multiple comparison test                      | 1. R37G11-GAL4                               | 0.8976   | N.S. |
|     |                       |                                                      | 2. R37G11-GAL4> UAS- Shi <sup>ts1</sup> 23°  |          |      |
|     |                       |                                                      | 1. UAS- Shi <sup>ts1</sup>                   | > 0.9999 | N.S. |
|     |                       |                                                      | 2. R37G11-GAL4> UAS- Shi <sup>ts1</sup> 32°  |          |      |
|     |                       |                                                      | 1. UAS- Shi <sup>ts1</sup>                   | 0.0680   | N.S. |
|     |                       |                                                      | 2. R37G11-GAL4> UAS- Shi <sup>ts1</sup> 23°  |          |      |
|     |                       |                                                      | 1. R37G11-GAL4> UAS- Shi <sup>ts1</sup> 23°  | 0.0309   | *    |
|     |                       |                                                      | 2. R37G11-GAL4> UAS- Shi <sup>ts1</sup> 32°  |          |      |
| S4B | 2-Butanone            | One-way non parametric ANOVA - Kruskal's-Wallis test | 1. LH989-GAL4                                | <0.0001  | **** |
|     |                       |                                                      | 2. UAS-Shi <sup>ts1</sup>                    |          |      |
|     |                       |                                                      | 3. LH989-GAL4> UAS-Shi <sup>ts1</sup> 23°    |          |      |
|     |                       |                                                      | 4. LH989-GAL4> UAS-Shi <sup>ts1</sup> 32°    |          |      |
|     |                       |                                                      | 1. LH989-GAL4                                | 0.6059   | N.S. |
|     |                       |                                                      | 2. UAS-Shi <sup>ts1</sup>                    |          |      |
|     |                       | Dunn's multiple comparison test                      | 1. LH989-GAL4                                | >0.9999  | N.S. |
|     |                       |                                                      | 2. LH989-GAL4> UAS-Shi <sup>ts1</sup> 23°    |          |      |
|     |                       |                                                      | 1. UAS-Shi <sup>ts1</sup>                    | >0.9999  | N.S. |
|     |                       |                                                      | 2. LH989-GAL4> UAS-Shi <sup>ts1</sup> 23°    |          |      |

|                 |                                                    |                                 |                                           |               |         |      |
|-----------------|----------------------------------------------------|---------------------------------|-------------------------------------------|---------------|---------|------|
|                 |                                                    |                                 | 1. LH989-GAL4                             | <0.0001       | ****    |      |
|                 |                                                    |                                 | 2. LH989-GAL4> UAS-Shi <sup>ts1</sup> 32° |               |         |      |
|                 |                                                    |                                 | 1. UAS-Shi <sup>ts1</sup>                 | <0.0001       | ****    |      |
|                 |                                                    |                                 | 2. LH989-GAL4> UAS-Shi <sup>ts1</sup> 32° |               |         |      |
|                 |                                                    |                                 | 1. LH989-GAL4> UAS-Shi <sup>ts1</sup> 23° | <0.0001       | ****    |      |
|                 |                                                    |                                 | 2. LH989-GAL4> UAS-Shi <sup>ts1</sup> 32° |               |         |      |
| Ethyl acetate   | One-way non parametric ANOVA–Kruskal’s-Wallis test |                                 | 1. LH989-GAL4                             | <0.0001       | ****    |      |
|                 |                                                    |                                 | 2. UAS-Shi <sup>ts1</sup>                 |               |         |      |
|                 |                                                    |                                 | 3. LH989-GAL4> UAS-Shi <sup>ts1</sup> 23° |               |         |      |
|                 |                                                    |                                 | 4. LH989-GAL4> UAS-Shi <sup>ts1</sup> 32° |               |         |      |
|                 |                                                    | Dunn’s multiple comparison test |                                           | 1. LH989-GAL4 | 0.0762  | N.S. |
|                 |                                                    |                                 | 2. UAS-Shi <sup>ts1</sup>                 |               |         |      |
|                 |                                                    |                                 | 1. LH989-GAL4                             | 0.5141        | N.S.    |      |
|                 |                                                    |                                 | 2. LH989-GAL4> UAS-Shi <sup>ts1</sup> 23° |               |         |      |
|                 |                                                    |                                 | 1. UAS-Shi <sup>ts1</sup>                 | >0.9999       | N.S.    |      |
|                 |                                                    |                                 | 2. LH989-GAL4> UAS-Shi <sup>ts1</sup> 23° |               |         |      |
|                 |                                                    |                                 | 1. LH989-GAL4                             | 0.0255        | *       |      |
|                 |                                                    |                                 | 2. LH989-GAL4> UAS-Shi <sup>ts1</sup> 32° |               |         |      |
|                 | 1. UAS-Shi <sup>ts1</sup>                          | <0.0001                         | ****                                      |               |         |      |
|                 | 2. LH989-GAL4> UAS-Shi <sup>ts1</sup> 32°          |                                 |                                           |               |         |      |
|                 | 1. LH989-GAL4> UAS-Shi <sup>ts1</sup> 23°          | 0.0004                          | ***                                       |               |         |      |
|                 | 2. LH989-GAL4> UAS-Shi <sup>ts1</sup> 32°          |                                 |                                           |               |         |      |
| ACV             | One-way non parametric ANOVA–Kruskal’s-Wallis test |                                 | 1. LH989-GAL4                             | <0.0001       | ****    |      |
|                 |                                                    |                                 | 2. UAS-Shi <sup>ts1</sup>                 |               |         |      |
|                 |                                                    |                                 | 3. LH989-GAL4> UAS-Shi <sup>ts1</sup> 23° |               |         |      |
|                 |                                                    |                                 | 4. LH989-GAL4> UAS-Shi <sup>ts1</sup> 32° |               |         |      |
|                 |                                                    | Dunn’s multiple comparison test |                                           | 1. LH989-GAL4 | >0.9999 | N.S. |
|                 |                                                    |                                 | 2. UAS-Shi <sup>ts1</sup>                 |               |         |      |
|                 |                                                    |                                 | 1. LH989-GAL4                             | 0.8478        | N.S.    |      |
|                 |                                                    |                                 | 2. LH989-GAL4> UAS-Shi <sup>ts1</sup> 23° |               |         |      |
|                 |                                                    |                                 | 1. UAS-Shi <sup>ts1</sup>                 | >0.9999       | N.S.    |      |
|                 |                                                    |                                 | 2. LH989-GAL4> UAS-Shi <sup>ts1</sup> 23° |               |         |      |
|                 |                                                    |                                 | 1. LH989-GAL4                             | 0.0029        | **      |      |
|                 |                                                    |                                 | 2. LH989-GAL4> UAS-Shi <sup>ts1</sup> 32° |               |         |      |
|                 | 1. UAS-Shi <sup>ts1</sup>                          | 0.0004                          | ***                                       |               |         |      |
|                 | 2. LH989-GAL4> UAS-Shi <sup>ts1</sup> 32°          |                                 |                                           |               |         |      |
|                 | 1. LH989-GAL4> UAS-Shi <sup>ts1</sup> 23°          | <0.0001                         | ****                                      |               |         |      |
|                 | 2. LH989-GAL4> UAS-Shi <sup>ts1</sup> 32°          |                                 |                                           |               |         |      |
| Geranyl acetate | One-way non parametric ANOVA–Kruskal’s-Wallis test |                                 | 1. LH989-GAL4                             | <0.0001       | ****    |      |
|                 |                                                    |                                 | 2. UAS-Shi <sup>ts1</sup>                 |               |         |      |
|                 |                                                    |                                 | 3. LH989-GAL4> UAS-Shi <sup>ts1</sup> 23° |               |         |      |
|                 |                                                    |                                 | 4. LH989-GAL4> UAS-Shi <sup>ts1</sup> 32° |               |         |      |
|                 |                                                    | Dunn’s multiple comparison test |                                           | 1. LH989-GAL4 | 0.3429  | N.S. |
|                 |                                                    |                                 | 2. UAS-Shi <sup>ts1</sup>                 |               |         |      |
|                 |                                                    |                                 | 1. LH989-GAL4                             | 0.0346        | *       |      |
|                 |                                                    |                                 | 2. LH989-GAL4> UAS-Shi <sup>ts1</sup> 23° |               |         |      |
|                 | 1. UAS-Shi <sup>ts1</sup>                          | >0.9999                         | N.S.                                      |               |         |      |
|                 | 2. LH989-GAL4> UAS-Shi <sup>ts1</sup> 23°          |                                 |                                           |               |         |      |
|                 | 1. LH989-GAL4                                      | <0.0001                         | ****                                      |               |         |      |
|                 |                                                    |                                 |                                           |               |         |      |



|               |                                                        |                                                            |                                           |         |      |
|---------------|--------------------------------------------------------|------------------------------------------------------------|-------------------------------------------|---------|------|
|               |                                                        |                                                            | 2. LH989-GAL4> UAS-Shi <sup>ts1</sup> 32° |         |      |
|               |                                                        |                                                            | 1. UAS-Shi <sup>ts1</sup>                 | <0.0001 | **** |
|               |                                                        |                                                            | 2. LH989-GAL4> UAS-Shi <sup>ts1</sup> 32° |         |      |
|               |                                                        |                                                            | 1. LH989-GAL4> UAS-Shi <sup>ts1</sup> 23° | <0.0001 | **** |
|               |                                                        |                                                            | 2. LH989-GAL4> UAS-Shi <sup>ts1</sup> 32° |         |      |
| Hexyl acetate | One-way non parametric ANOVA–<br>Kruskal’s-Wallis test |                                                            | 1. LH989-GAL4                             | <0.0001 | **** |
|               |                                                        |                                                            | 2. UAS-Shi <sup>ts1</sup>                 |         |      |
|               |                                                        |                                                            | 3. LH989-GAL4> UAS-Shi <sup>ts1</sup> 23° |         |      |
|               |                                                        |                                                            | 4. LH989-GAL4> UAS-Shi <sup>ts1</sup> 32° |         |      |
|               | Dunn's multiple comparison test                        |                                                            | 1. LH989-GAL4                             | >0.9999 | N.S. |
|               |                                                        |                                                            | 2. UAS-Shi <sup>ts1</sup>                 |         |      |
|               |                                                        |                                                            | 1. LH989-GAL4                             | >0.9999 | N.S. |
|               |                                                        |                                                            | 2. LH989-GAL4> UAS-Shi <sup>ts1</sup> 23° |         |      |
|               |                                                        |                                                            | 1. UAS-Shi <sup>ts1</sup>                 | 0.4117  | N.S. |
|               |                                                        |                                                            | 2. LH989-GAL4> UAS-Shi <sup>ts1</sup> 23° |         |      |
|               |                                                        |                                                            | 1. LH989-GAL4                             | <0.0001 | **** |
|               |                                                        |                                                            | 2. LH989-GAL4> UAS-Shi <sup>ts1</sup> 32° |         |      |
|               |                                                        |                                                            | 1. UAS-Shi <sup>ts1</sup>                 | <0.0001 | **** |
|               |                                                        |                                                            | 2. LH989-GAL4> UAS-Shi <sup>ts1</sup> 32° |         |      |
|               |                                                        |                                                            | 1. LH989-GAL4> UAS-Shi <sup>ts1</sup> 23° | <0.0001 | **** |
|               |                                                        |                                                            | 2. LH989-GAL4> UAS-Shi <sup>ts1</sup> 32° |         |      |
| S5            | Learning index for Ethyl acetate 10-4                  | Mann Whitney Non-parametric t-test                         | 1. UAS- Shi <sup>ts1</sup> No shock       | <0.0001 | **** |
|               |                                                        |                                                            | 2. UAS- Shi <sup>ts1</sup> shock          |         |      |
|               | Learning index for ACV 10-4                            | Mann Whitney Non-parametric t-test                         | 1. UAS- Shi <sup>ts1</sup> No shock       | 0.02    | *    |
|               |                                                        |                                                            | 2. UAS- Shi <sup>ts1</sup> shock          |         |      |
| S6            | Time to peak                                           | Two-Way Ordinary ANOVA                                     | Interaction                               | 0.56    | N.S. |
|               |                                                        | Two-Way ordinary ANOVA<br>Sidak's multiple comparison test | Main effect of odor                       | <0.0001 | **** |
|               |                                                        |                                                            | Main effect of condition (Fed Vs starved) | 0.002   | **   |
|               |                                                        |                                                            | Ethyl acetate fed Vs starved              | >0.999  | N.S. |
|               |                                                        |                                                            | Ethyl lactate fed Vs starved              | 0.999   | N.S. |
|               |                                                        |                                                            | Geranyl acetate fed Vs starved            | >0.999  | N.S. |
|               |                                                        |                                                            | 2-butanone fed Vs starved                 | 0.069   | N.S. |
|               |                                                        | Sidak's multiple comparison test                           | MCH fed Vs starved                        | 0.999   | N.S. |
|               |                                                        |                                                            | Hexyl acetate fed Vs starved              | >0.999  | N.S. |
|               |                                                        |                                                            | 2-heptanone fed Vs starved                | 0.995   | N.S. |
|               |                                                        |                                                            | Ethyl propionate fed Vs starved           | 0.914   | N.S. |
|               |                                                        |                                                            | Linalool fed Vs starved                   | 0.999   | N.S. |
|               |                                                        |                                                            | Acetic acid fed Vs starved                | 0.009   | **   |

|                                                      |                                                      |                                                      |    |                                          |                                          |          |        |      |
|------------------------------------------------------|------------------------------------------------------|------------------------------------------------------|----|------------------------------------------|------------------------------------------|----------|--------|------|
| S7B<br>Top                                           | avoidance index for 2-butanone Vs ethyl lactate      | One-way non parametric ANOVA - Kruskal's-Wallis test | 1. | R37G11-GAL4                              | <0.0001                                  | ****     |        |      |
|                                                      |                                                      |                                                      | 2. | UAS- Shi <sup>ts1</sup>                  |                                          |          |        |      |
|                                                      |                                                      |                                                      | 3. | R37G11-GAL4> UAS- Shi <sup>ts1</sup> 23° |                                          |          |        |      |
|                                                      |                                                      |                                                      | 4. | R37G11-GAL4> UAS- Shi <sup>ts1</sup> 32° |                                          |          |        |      |
|                                                      |                                                      |                                                      | 1. | R37G11-GAL4                              |                                          |          | 0.1292 | N.S. |
|                                                      |                                                      |                                                      | 2. | UAS- Shi <sup>ts1</sup>                  |                                          |          |        |      |
|                                                      | Dunn's multiple comparison test                      |                                                      |    | 1.                                       | R37G11-GAL4                              | 0.7440   | N.S.   |      |
|                                                      |                                                      |                                                      |    | 2.                                       | R37G11-GAL4> UAS- Shi <sup>ts1</sup> 23° |          |        |      |
|                                                      |                                                      |                                                      |    | 1.                                       | UAS- Shi <sup>ts1</sup>                  | >0.999   | N.S.   |      |
|                                                      |                                                      |                                                      |    | 2.                                       | R37G11-GAL4> UAS- Shi <sup>ts1</sup> 23° |          |        |      |
|                                                      |                                                      |                                                      |    | 1.                                       | R37G11-GAL4                              | < 0.0001 | ****   |      |
|                                                      |                                                      |                                                      |    | 2.                                       | R37G11-GAL4> UAS- Shi <sup>ts1</sup> 32° |          |        |      |
| avoidance index for ethyl lactate Vs geranyl acetate | One-way non parametric ANOVA - Kruskal's-Wallis test |                                                      | 1. | UAS- Shi <sup>ts1</sup>                  | 0.3345                                   | N.S.     |        |      |
|                                                      |                                                      |                                                      | 2. | R37G11-GAL4> UAS- Shi <sup>ts1</sup> 32° |                                          |          |        |      |
|                                                      |                                                      |                                                      | 1. | R37G11-GAL4> UAS- Shi <sup>ts1</sup> 23° | 0.0020                                   | **       |        |      |
|                                                      |                                                      |                                                      | 2. | R37G11-GAL4> UAS- Shi <sup>ts1</sup> 32° |                                          |          |        |      |
|                                                      |                                                      |                                                      | 1. | R37G11-GAL4                              | 0.2461                                   | N.S.     |        |      |
|                                                      |                                                      |                                                      | 2. | UAS- Shi <sup>ts1</sup>                  |                                          |          |        |      |
| S7B<br>Bottom                                        | Learning index for ethyl lactate Vs 2-butanone       | One-way non parametric ANOVA - Kruskal's-Wallis test | 1. | R37G11-GAL4                              | <0.0001                                  | ****     |        |      |
|                                                      |                                                      |                                                      | 2. | UAS- Shi <sup>ts1</sup>                  |                                          |          |        |      |
|                                                      |                                                      |                                                      | 3. | R37G11-GAL4> UAS- Shi <sup>ts1</sup> 23° |                                          |          |        |      |
|                                                      |                                                      |                                                      | 4. | R37G11-GAL4> UAS- Shi <sup>ts1</sup> 32° |                                          |          |        |      |
|                                                      |                                                      |                                                      | 1. | R37G11-GAL4                              |                                          |          | >0.999 | N.S. |
|                                                      |                                                      |                                                      | 2. | UAS- Shi <sup>ts1</sup>                  |                                          |          |        |      |
|                                                      | Dunn's multiple comparison test                      |                                                      |    | 1.                                       | R37G11-GAL4                              | 0.108    | N.S.   |      |
|                                                      |                                                      |                                                      |    | 2.                                       | R37G11-GAL4> UAS- Shi <sup>ts1</sup> 23° |          |        |      |
|                                                      |                                                      |                                                      |    | 1.                                       | UAS- Shi <sup>ts1</sup>                  | 0.753    | N.S.   |      |
|                                                      |                                                      |                                                      |    | 2.                                       | R37G11-GAL4> UAS- Shi <sup>ts1</sup> 23° |          |        |      |
|                                                      |                                                      |                                                      |    | 1.                                       | R37G11-GAL4                              | 0.037    | *      |      |
|                                                      |                                                      |                                                      |    | 2.                                       | R37G11-GAL4> UAS- Shi <sup>ts1</sup> 32° |          |        |      |
| Learning index for geranyl acetate Vs ethyl lactate  | One-way non parametric ANOVA - Kruskal's-Wallis test |                                                      | 1. | UAS- Shi <sup>ts1</sup>                  | 0.003                                    | **       |        |      |
|                                                      |                                                      |                                                      | 2. | R37G11-GAL4> UAS- Shi <sup>ts1</sup> 32° |                                          |          |        |      |
|                                                      |                                                      |                                                      | 1. | R37G11-GAL4> UAS- Shi <sup>ts1</sup> 23° | <0.0001                                  | ****     |        |      |
|                                                      |                                                      |                                                      | 2. | R37G11-GAL4> UAS- Shi <sup>ts1</sup> 32° |                                          |          |        |      |
|                                                      |                                                      |                                                      | 1. | R37G11-GAL4                              | 0.144                                    | N.S.     |        |      |
|                                                      |                                                      |                                                      | 2. | UAS- Shi <sup>ts1</sup>                  |                                          |          |        |      |
|                                                      |                                                      |                                                      | 3. | R37G11-GAL4> UAS- Shi <sup>ts1</sup> 23° |                                          |          |        |      |
|                                                      |                                                      |                                                      | 4. | R37G11-GAL4> UAS- Shi <sup>ts1</sup> 32° |                                          |          |        |      |
